# Supplementary material for: Mass-Rearing of Drosophila suzukii for Sterile Insect Technique Application: Evaluation of Two Oviposition Systems
Source: PubMed Central journal article supplement (PMC6956338; doi:10.3390/insects10120448), 2019-12-12
Supplement: insects-10-00448-s001.pdf [file insects-10-00448-s001.pdf]

# Mass-rearing of *Drosophila suzukii* for Sterile Insect Technique application: Evaluation of two oviposition systems

Fabiana Sassù <sup>1,2\*</sup>, Katerina Nikolouli <sup>1,2</sup>, Silvana Caravantes <sup>2</sup>, Gustavo Taret <sup>3</sup>, Rui Pereira <sup>2</sup>, Marc J. B.Vreysen <sup>2</sup>, Christian Stauffer <sup>1</sup> and Carlos Cáceres <sup>2</sup>

## S1. Statistical analyses

R Core Team (2019). R: A language and environment for statistical computing. R Foundation for Statistical Computing, Vienna, Austria. URL <https://www.R-project.org/>.

### Libraries

```
library(Matrix)
library(carDATA)
library(MASS)
library(lme4)
library(nlme)
library(gridExtra)
library(sjmisc)
library(dplyr)
library(emmeans)
library(blmecco)
library(arm)
library(DHARMA)
library(AER)
library(psc1)
library(dispmo)
library(ggplot2)
```

### Test the influence of the generations on the two oviposition systems

```
> fit <- lm(m1 ~ tec*block, data = mas)
```

```
> summary(fit)
```

Call:

```
lm(formula = m1 ~ tec * block, data = mas)
```

Residuals:

| Min      | 1Q       | Median   | 3Q      | Max     |
|----------|----------|----------|---------|---------|
| -0.48136 | -0.16842 | -0.00833 | 0.15500 | 0.73158 |

Coefficients:

|               | Estimate  | Std. Error | t value | Pr(> t )     |
|---------------|-----------|------------|---------|--------------|
| (Intercept)   | 0.408333  | 0.054223   | 7.531   | 2.35e-12 *** |
| tecwax        | 0.027778  | 0.076683   | 0.362   | 0.718        |
| block2        | 0.036667  | 0.074741   | 0.491   | 0.624        |
| block3        | 0.060088  | 0.075667   | 0.794   | 0.428        |
| block4        | -0.003333 | 0.073114   | -0.046  | 0.964        |
| block5        | 0.016667  | 0.079043   | 0.211   | 0.833        |
| tecwax:block2 | 0.089222  | 0.105700   | 0.844   | 0.400        |
| tecwax:block3 | -0.025146 | 0.107009   | -0.235  | 0.814        |
| tecwax:block4 | 0.058586  | 0.103399   | 0.567   | 0.572        |
| tecwax:block5 | 0.019097  | 0.111783   | 0.171   | 0.865        |

---

Signif. codes: 0 '\*\*\*' 0.001 '\*\*' 0.01 '\*' 0.05 '.' 0.1 ' ' 1

Residual standard error: 0.23 on 180 degrees of freedom

Multiple R-squared: 0.0388, Adjusted R-squared: -0.009261

F-statistic: 0.8073 on 9 and 180 DF, p-value: 0.61

```
> lsmeans(fit, "block")
> lsmeans(fit, pairwise ~ block)
$lsmeans
  block lsmean      SE  df lower.CL upper.CL
1      0.422 0.0383 180   0.347   0.498
2      0.503 0.0364 180   0.432   0.575
3      0.470 0.0373 180   0.396   0.543
4      0.448 0.0347 180   0.380   0.517
5      0.448 0.0407 180   0.368   0.529
```

Results are averaged over the levels of: tec  
Confidence level used: 0.95

```
$contrasts
contrast estimate      SE  df t.ratio p.value
1 - 2    -0.081278 0.0528 180  -1.538 0.5393
1 - 3    -0.047515 0.0535 180  -0.888 0.9010
1 - 4    -0.025960 0.0517 180  -0.502 0.9871
1 - 5    -0.026215 0.0559 180  -0.469 0.9900
2 - 3     0.033763 0.0521 180   0.648 0.9668
2 - 4     0.055318 0.0503 180   1.101 0.8060
2 - 5     0.055063 0.0546 180   1.009 0.8509
3 - 4     0.021555 0.0509 180   0.423 0.9933
3 - 5     0.021299 0.0552 180   0.386 0.9953
4 - 5    -0.000256 0.0534 180  -0.005 1.0000
```

Results are averaged over the levels of: tec  
P value adjustment: tukey method for comparing a family of 5 estimates

```
> resx<-residuals(fit)
> qqnorm(resx, main = "Normal Q-Q Plot",
  xlab = "Theoretical Quantiles", ylab = "Sample Quantiles",
  plot.it = TRUE, datax = FALSE)
```

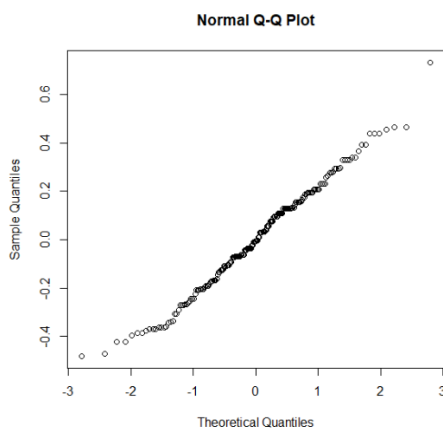

```
> hist(resx)
```

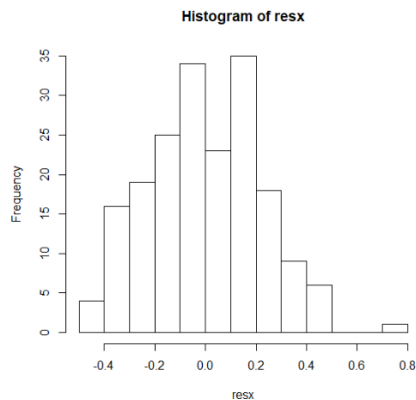

```
> tec_block <- factor(interaction(mas$tec,mas$block))
> tec_block
> kruskal.test (m1 ~ tec_block, data=mas)
kruskal-wallis chi-squared = 6.0276, df = 9, p-value = 0.7372
```

### Egg production (mL)

Summary

```
> group_by(mas, tec) %>%
summarise(
count = n(),
mean = mean(m1, na.rm = TRUE),
sd = sd(m1, na.rm = TRUE),
median = median(m1, na.rm = TRUE),
IQR = IQR(m1, na.rm = TRUE))
A tibble: 2 x 6
  tec count mean sd median IQR
<fct> <int> <dbl> <dbl> <dbl> <dbl>
1 net 95 0.430 0.213 0.4 0.3
2 wax 95 0.488 0.242 0.5 0.3
```

### Descriptive analyses

WAX

```
> mas_join_wax = mas_join[mas_join$tec == "wax",]
> ggplot(data = mas_join_wax,
aes(x = day_diff, y = m1, color = as.factor(block), size =0.1)) +
ggtitle("wax treatment m1 per experiment by blocks and date") +
geom_line()+ geom_point()
```

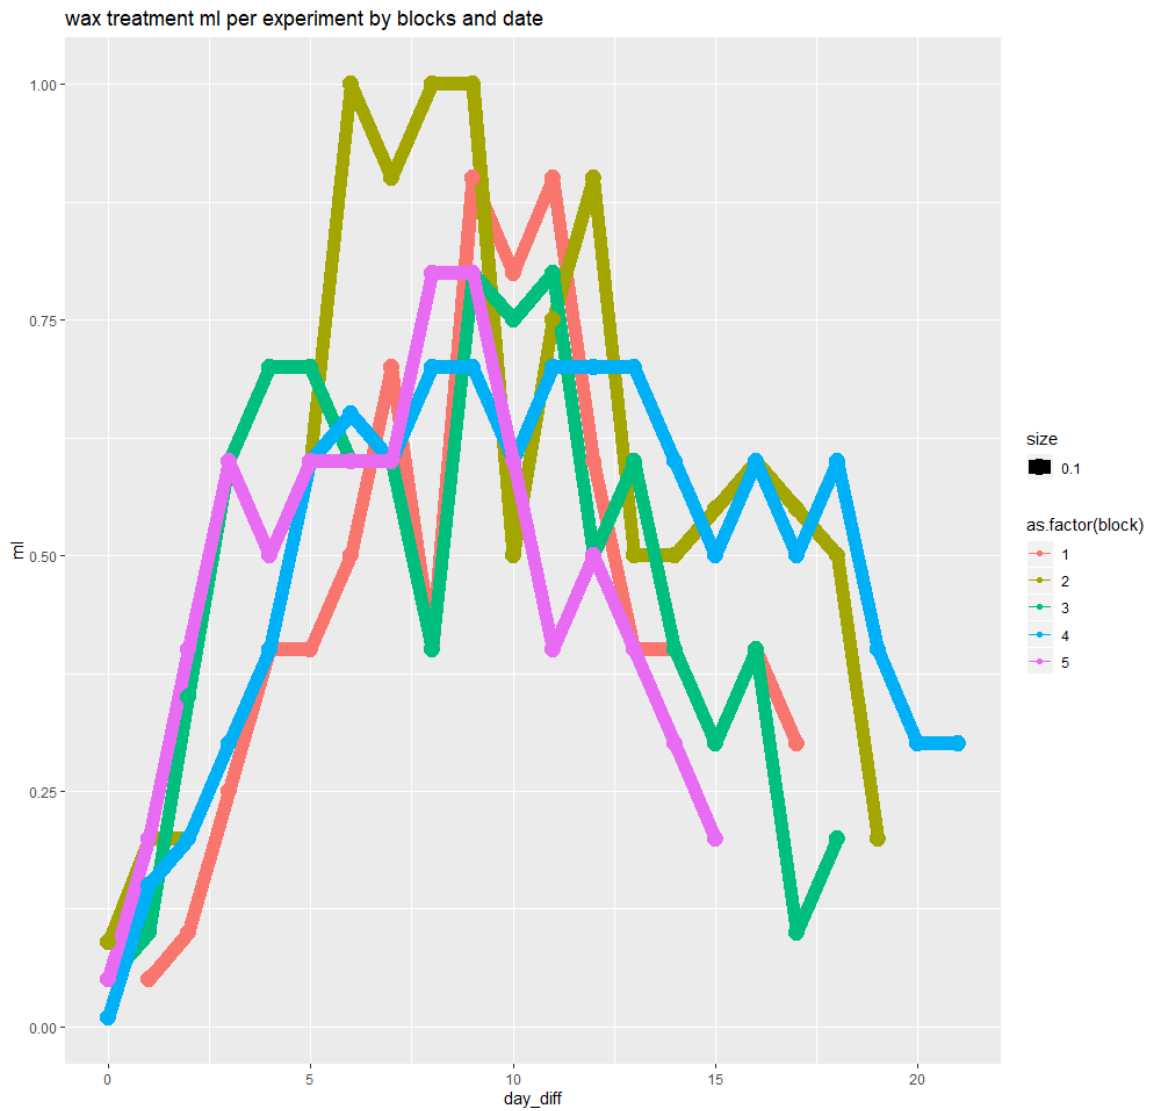

NET

```
> mas_join_net = mas_join[mas_join$tec == "net",]
> ggplot(data = mas_join_net,
  aes(x = day_diff, y = ml, color = as.factor(block), size = 0.1)) +
  ggtitle("net treatment ml per experiment by blocks and date") +
  geom_line()+
  geom_point()
```

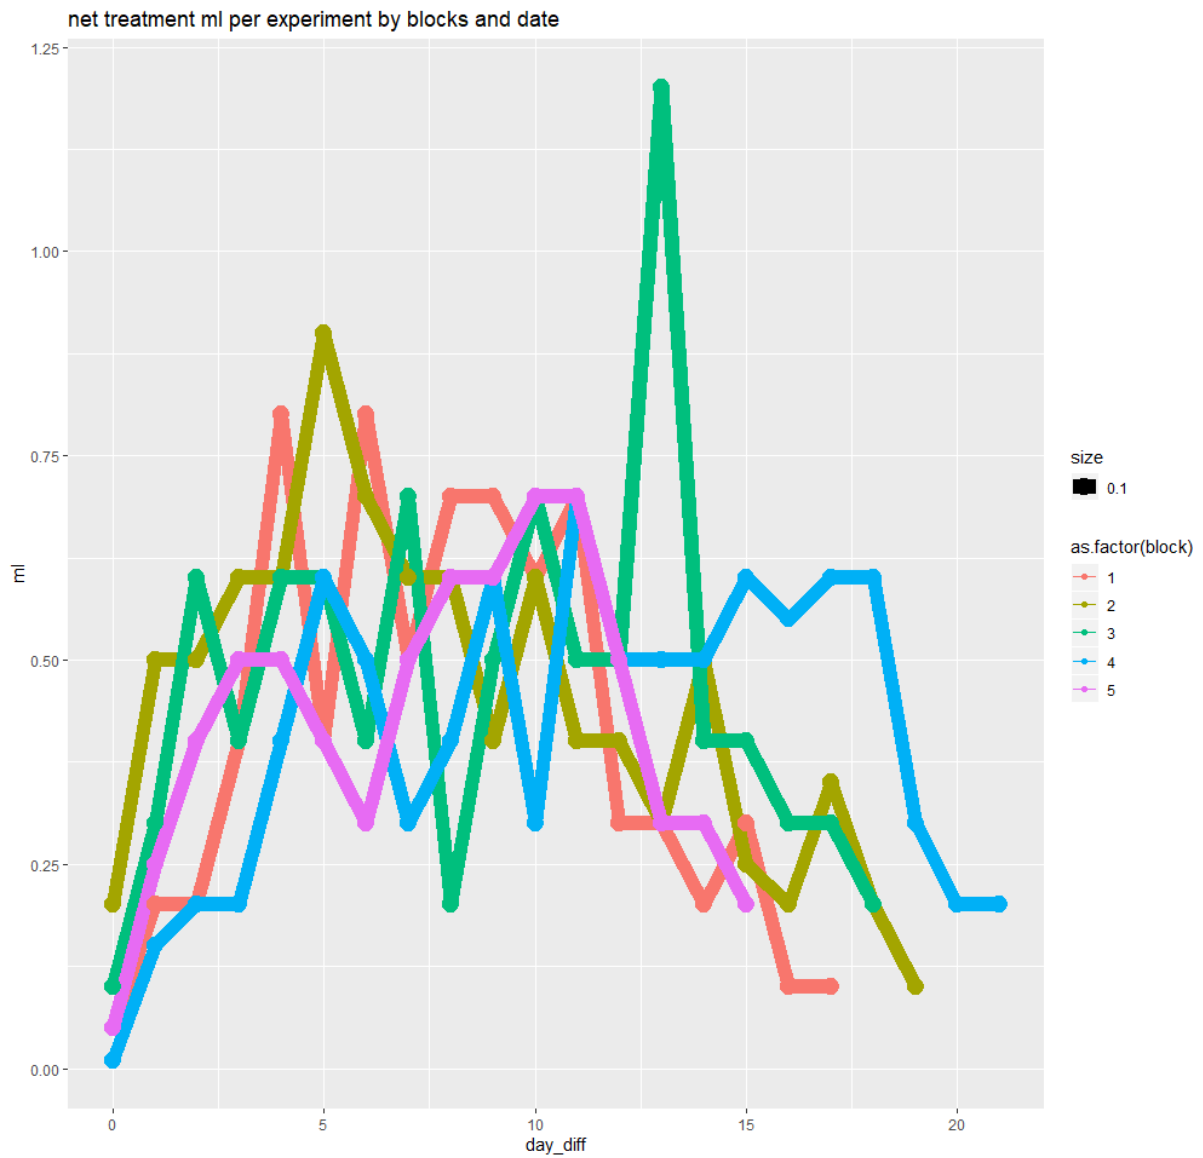

```
net and wax per all replicas
> boxplot(mas_join$ml~mas_join$tec, data= mas_join, col=c("darkcyan",
"chocolate1"),xlab="Cage type/ All replicates",
+         ylab="egg production (mL)")
```

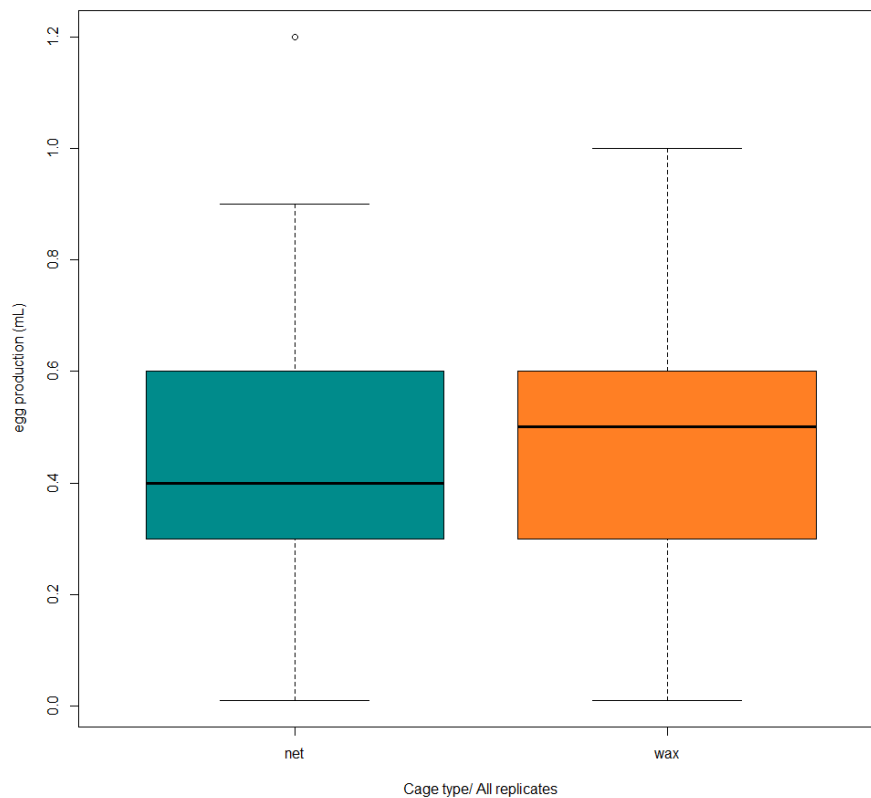

Fit model

```
> model_0 = lme(m1 ~ as.numeric(day_diff) + tec, random = ~1|block,
+ data = mas_join)
```

```
> summary(model_0)
```

Linear mixed-effects model fit by REML

Data: mas\_join

|  | AIC     | BIC      | logLik  |
|--|---------|----------|---------|
|  | 2.58034 | 18.70907 | 3.70983 |

Random effects:

Formula: ~1 | block

|         | (Intercept)  | Residual  |
|---------|--------------|-----------|
| StdDev: | 5.949349e-06 | 0.2261127 |

Fixed effects: m1 ~ as.numeric(day\_diff) + tec

|                      | Value     | Std.Error  | DF  | t-value   | p-value |
|----------------------|-----------|------------|-----|-----------|---------|
| (Intercept)          | 0.4051318 | 0.03528918 | 182 | 11.480339 | 0.0000  |
| as.numeric(day_diff) | 0.0027427 | 0.00292054 | 182 | 0.939125  | 0.3489  |
| tecwax               | 0.0627142 | 0.03289623 | 182 | 1.906424  | 0.0582  |

Correlation:

|                      | (Intr) | as.(.) |
|----------------------|--------|--------|
| as.numeric(day_diff) | -0.754 |        |
| tecwax               | -0.457 | -0.009 |

Standardized within-Group Residuals:

|  | Min         | Q1          | Med         | Q3         | Max        |
|--|-------------|-------------|-------------|------------|------------|
|  | -2.02485750 | -0.69821185 | -0.02761661 | 0.74051879 | 3.35767288 |

Number of Observations: 189

Number of Groups: 5

## Homoscedasticity

```
> plot(model_0)
```

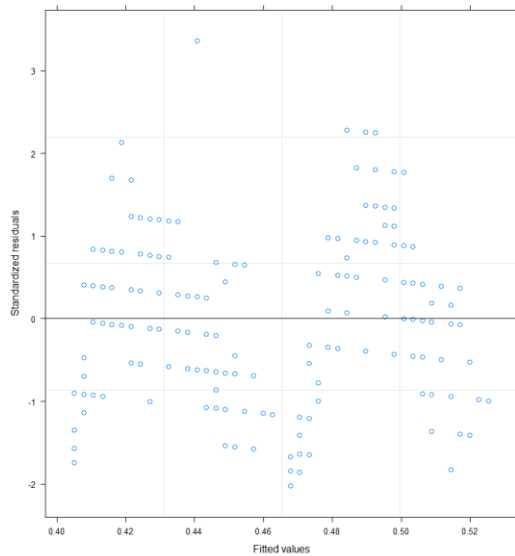

```
> fligner.test(m1~tec, data=mas)
```

Fligner-Killeen:med chi-squared = 1.1933, df = 1, p-value = 0.2747

## Normality

```
> res = model_0$residuals  
> ggplot(data = resid(model_0))  
> hist(breaks = 20)  
> qqnorm(resid(model_0))  
> qqline(resid(model_0))
```

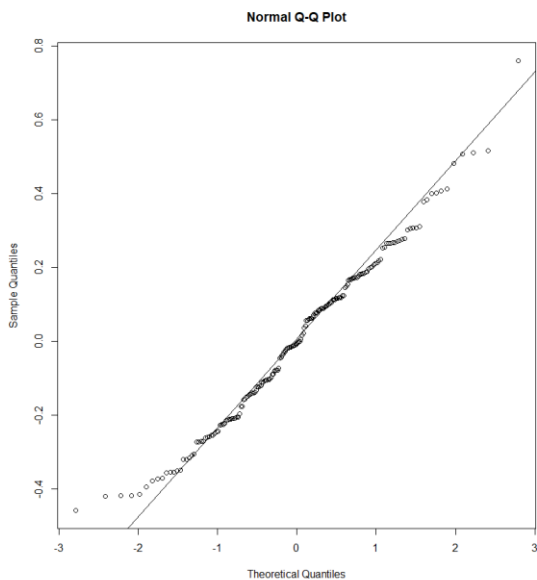

```
> shapiro.test(mas$m1)
```

W = 0.97614, p-value = 0.002468

## Non-parametric wilcox.test

```
> wilcox.test(m1 ~ tec, data=mas_join)
```

W = 3739.5, p-value = 0.05208

## Egg hatch

## Summary

```
> group_by(mas, tec) %>%  
  summarise(  
    count = n(),  
    mean = mean(hatching, na.rm = TRUE),  
    sd = sd(hatching, na.rm = TRUE),  
    median = median(hatching, na.rm = TRUE),  
    IQR = IQR(hatching, na.rm = TRUE))
```

A tibble: 2 x 6

|   | tec   | count | mean  | sd    | median | IQR   |
|---|-------|-------|-------|-------|--------|-------|
|   | <fct> | <int> | <dbl> | <dbl> | <dbl>  | <dbl> |
| 1 | net   | 95    | 42.7  | 22.6  | 38     | 37.5  |
| 2 | wax   | 95    | 57.3  | 16.9  | 58     | 24    |

## Descriptive analyses

WAX

```
> mas_join_wax = mas_join[mas_join$tec == "wax",]  
> ggplot(data = mas_join_wax,  
+       aes(x = day_diff, y = hatc, color = as.factor(block), size =0.1))  
+  
+   ggtitle("wax cage type egg hatch by blocks and date") +  
+   geom_line()+  
+   geom_point()+  
  xlab("Day count") +  
  ylab("Egg hatch")
```



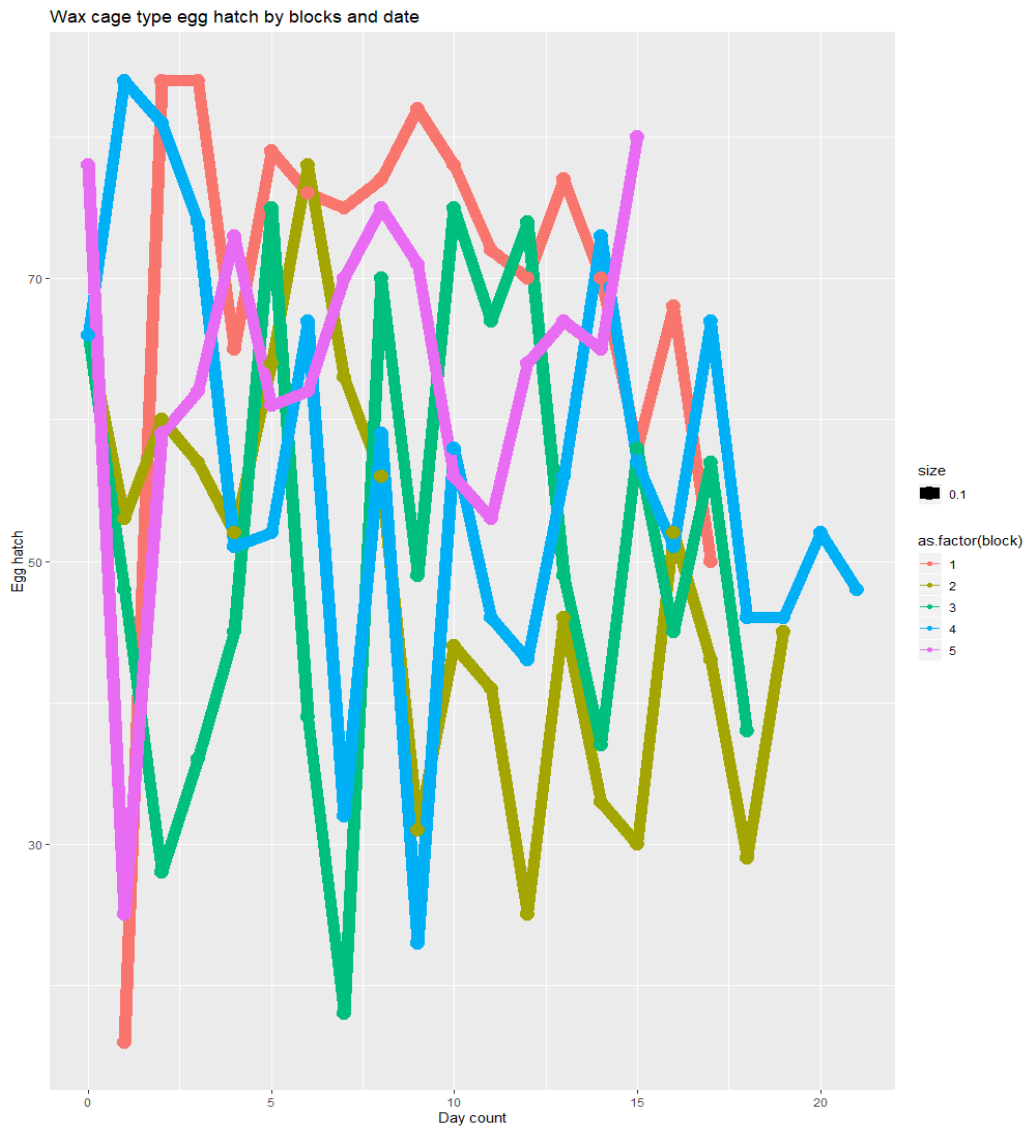

NET

```

> mas_join_net = mas_join[mas_join$tec == "net",]
> ggplot(data = mas_join_net,
+         aes(x = day_diff, y = hatc, color = as.factor(block), size =0.1))
+
+   ggtitle("Net cage type egg hatch by blocks and date") +
+   geom_line()+
+   geom_point()+
+   xlab("Day count") +
+   ylab("Egg hatch")

```

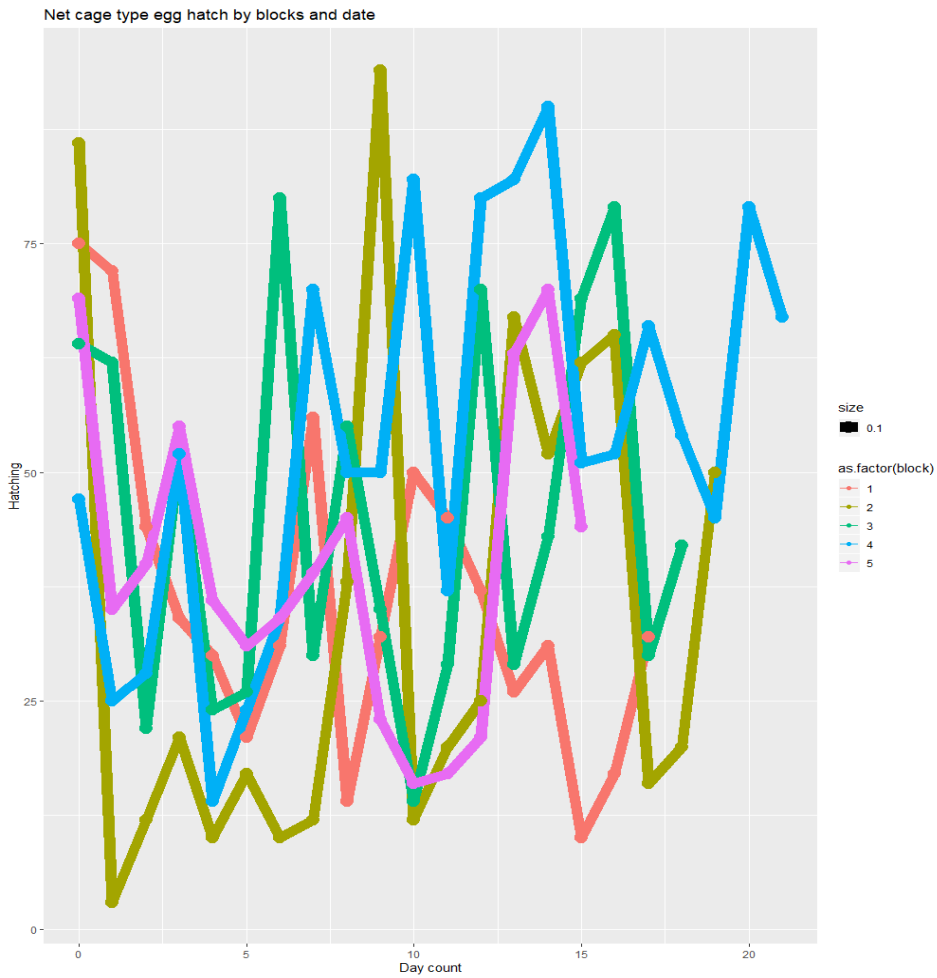

```
net and wax per all replicas
> boxplot(mas_join$hatc~mas_join$tec, data= mas_join, col=c("darkcyan",
"chocolate1"),xlab="Cage type",
+         ylab="egg hatched")
```

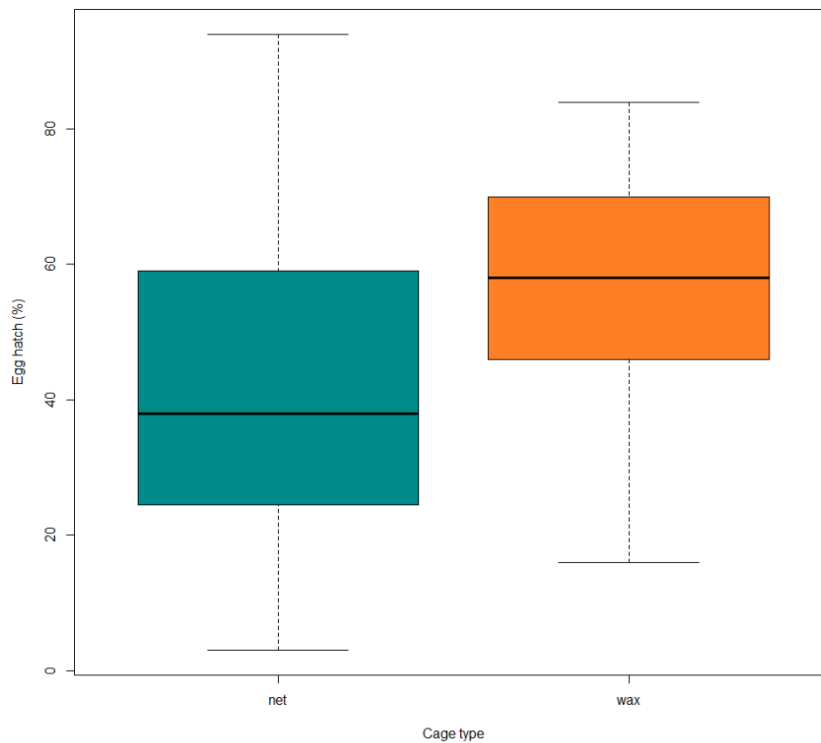

Fit model

Model with time

```
> model_0hatc2 = lme(hatc2~ as.numeric(day_diff) + tec, random = ~1|block,
+ data = mas_join)
```

```
> summary(model_0hatc2)
```

Linear mixed-effects model fit by REML

Data: mas\_join

|  | AIC      | BIC      | logLik    |
|--|----------|----------|-----------|
|  | 1662.113 | 1678.242 | -826.0566 |

Random effects:

Formula: ~1 | block

(Intercept) Residual

StdDev: 4.323449 19.35764

Fixed effects: hatc2 ~ as.numeric(day\_diff) + tec

|                      | Value    | Std. Error | DF  | t-value   | p-value |
|----------------------|----------|------------|-----|-----------|---------|
| (Intercept)          | 42.29832 | 3.592450   | 182 | 11.774227 | 0.0000  |
| as.numeric(day_diff) | 0.00410  | 0.252493   | 182 | 0.016226  | 0.9871  |
| tecwax               | 14.88483 | 2.816373   | 182 | 5.285107  | 0.0000  |

Correlation:

|                      | (Intr) | as.(_) |
|----------------------|--------|--------|
| as.numeric(day_diff) | -0.635 |        |
| tecwax               | -0.384 | -0.008 |

Standardized within-Group Residuals:

|  | Min         | Q1          | Med        | Q3         | Max        |
|--|-------------|-------------|------------|------------|------------|
|  | -2.22460786 | -0.73307599 | 0.01632077 | 0.69024556 | 2.95388646 |

Number of Observations: 189

Number of Groups: 5

-> Effect of time not significant

Fit model for hatching without time

```

> model_4hatc = lme(hatc~ tec,
+                   random = ~1|block,
+                   data = mas_join)
> summary(model_4hatc)
Linear mixed-effects model fit by REML
Data: mas_join
      AIC      BIC    logLik
-63.13778 -50.21334 35.56889

Random effects:
Formula: ~1 | block
      (Intercept) Residual
StdDev: 0.04320636 0.1930527

Fixed effects: hatc ~ tec
              Value Std.Error DF   t-value p-value
(Intercept) 0.4233539 0.02769677 183 15.285316     0
tecwax       0.1488525 0.02808654 183  5.299779     0
Correlation:
      (Intr)
tecwax -0.504

Standardized within-Group Residuals:
      Min      Q1      Med      Q3      Max
-2.2324695 -0.7362335  0.0156079  0.6903789  2.9622248

Number of Observations: 189
Number of Groups: 5

> lsmeans(model_4hatc, pairwise ~ tec) comparisons of groups
$lsmeans
      tec lsmean      SE df lower.CL upper.CL
net  0.423 0.0277  4    0.346  0.500
wax  0.572 0.0278  4    0.495  0.649

d.f. method: containment
Confidence level used: 0.95

$constrasts
      contrast estimate      SE df t.ratio p.value
net - wax    -0.149 0.0281 183 -5.300 <.0001

> comp_m1 <- emmeans(model_4hatc, ~tec)
> CLD(comp_m1)
      tec emmean      SE df lower.CL upper.CL .group
net  0.423 0.0277  4    0.346  0.500  1
wax  0.572 0.0278  4    0.495  0.649  2

d.f. method: containment
Confidence level used: 0.95
significance level used: alpha = 0.05
> data_predicted = mas_join
> data_predicted$predictions = predict(model_4hatc, newdata = mas_join)
> df_means_in_time_pred = aggregate(data_predicted$predictions, by =
list(data_predicted$day_diff,data_predicted$tec ), FUN = mean)
> ggplot(data = df_means_in_time_pred,
+        aes(x = day_diff, y = predictions, color = as.factor(tec), size
=0.1)) +
+   ggtitle ("Egg hatch per cage by blocks and date") +

```

```
+ geom_line() +  
+ geom_line(aes(day_diff, hatc, colour=tec), df_means_in_time)  
Egg hatch per cage by blocks and date
```

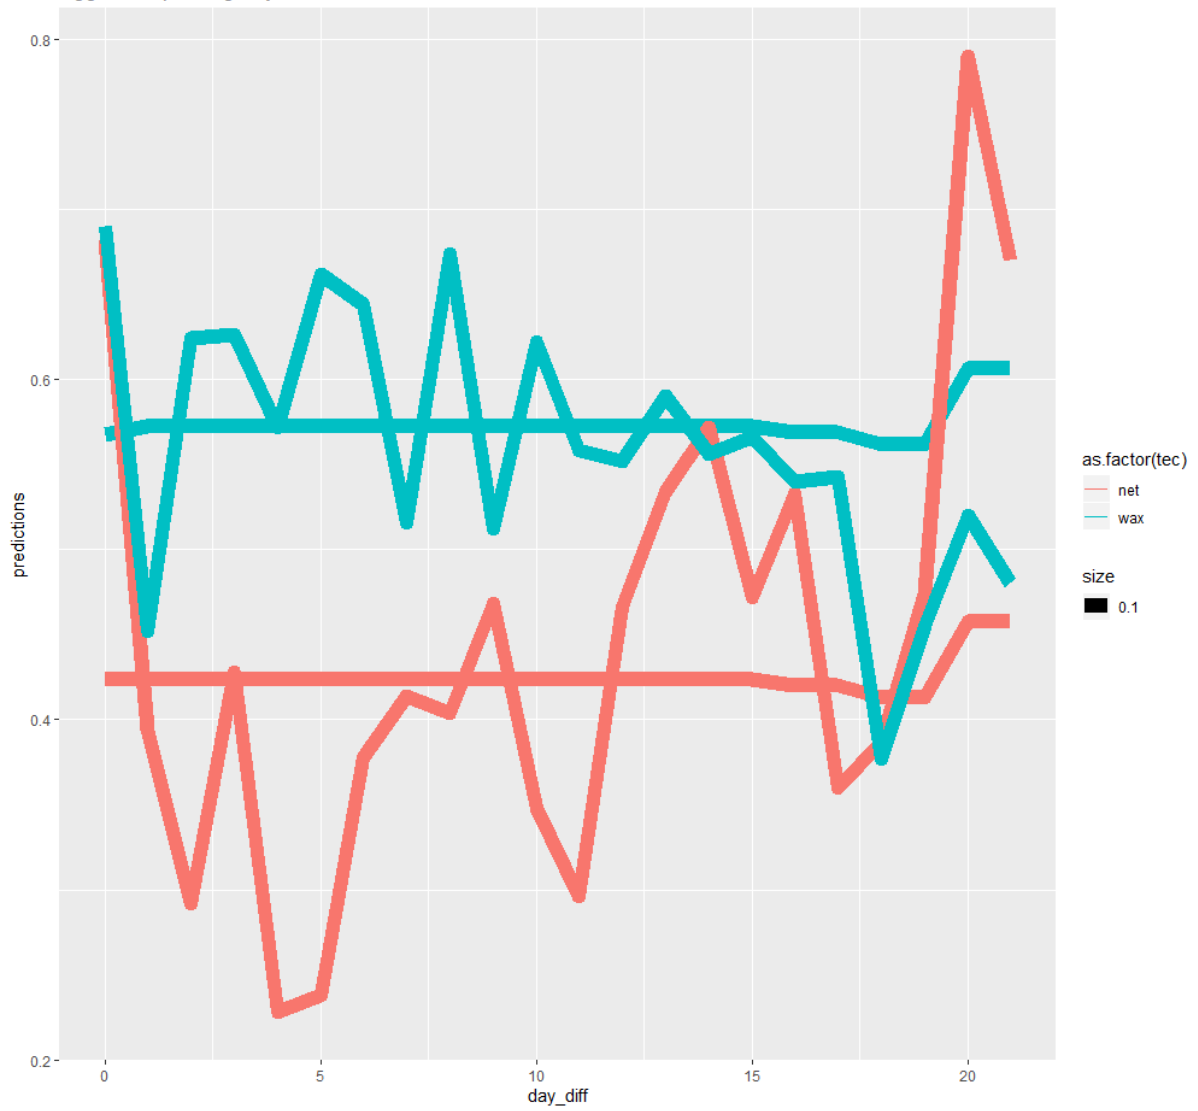

```
Homoscedasticity  
> plot(model_4hatc)
```

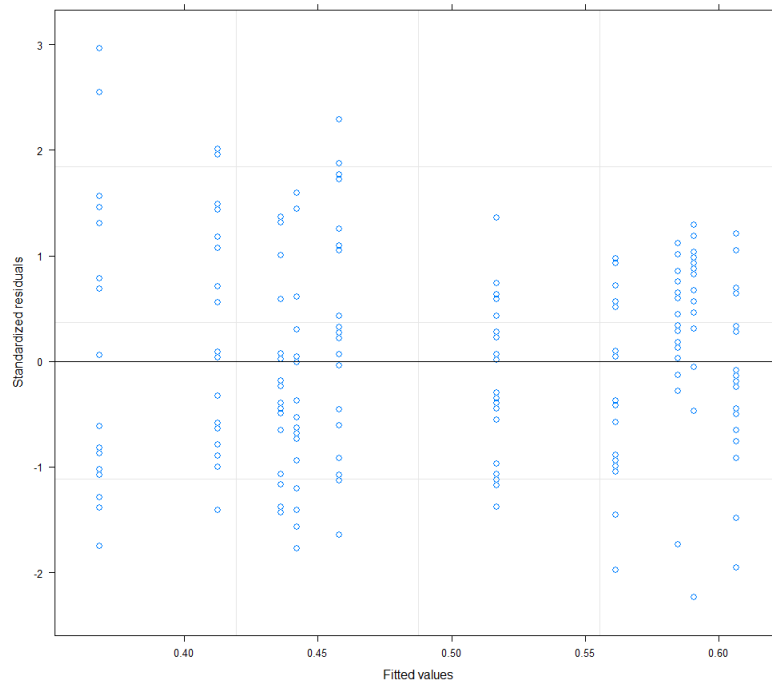

```
> intervals(model_4hatc, which = "fixed")
Approximate 95% confidence intervals
```

Fixed effects:

|             | lower      | est.      | upper     |
|-------------|------------|-----------|-----------|
| (Intercept) | 0.36870782 | 0.4233539 | 0.4779999 |
| tecwax      | 0.09343738 | 0.1488525 | 0.2042676 |

```
attr("label")
```

```
[1] "Fixed effects:"
```

```
> Normality
```

```
> class(TONES model_4hatc I$residuals)
```

```
> res = model_4hatc$residuals
```

```
> ggplot(data = resid(model_4hatc))
```

```
> hist(, breaks = 20)
```

```
> qqnorm(resid(model_4hatc))
```

```
> qqline(resid(model_4hatc))
```

```
> qqplot(res[,1])
```

```
> qqplot(model_4hatc$residuals)
```

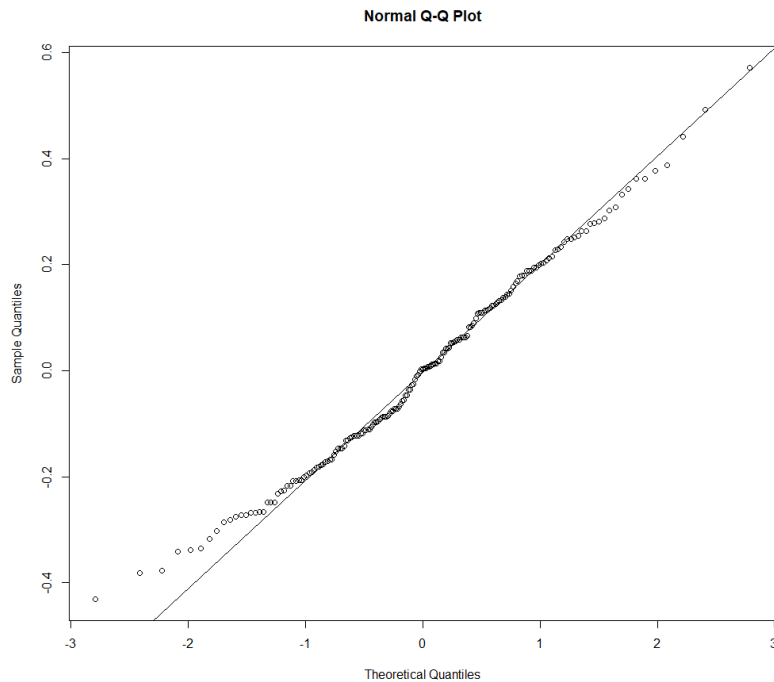

```
> shapiro.test(model_4hatc$residuals)
Shapiro-wilk normality test
data:  model_4hatc$residuals
W = 0.99038, p-value = 0.01422
```

```
> kruskal.test (hatc2 ~ tec, data=mas_join)
Kruskal-wallis chi-squared = 23.513, df = 1, p-value = 1.24e-06
```

### Egg to pupae time (Larval Development)

Summary

```
> group_by(mas, tec) %>%
  summarise(
    count = n(),
    mean = mean(larva.develop, na.rm = TRUE),
    sd = sd(larva.develop, na.rm = TRUE),
    median = median(larva.develop, na.rm = TRUE),
    IQR = IQR(larva.develop, na.rm = TRUE))
```

A tibble: 2 x 6

| tec   | count | mean  | sd    | median | IQR   |
|-------|-------|-------|-------|--------|-------|
| <fct> | <int> | <dbl> | <dbl> | <int>  | <dbl> |
| 1 net | 95    | 7.47  | 0.867 | 7      | 1     |
| 2 wax | 95    | 7.63  | 0.858 | 8      | 1     |

```
> shapiro.test(mas$larva.develop)
```

W = 0.86879, p-value = 1.045e-10

```
> fligner.test(larva.develop~tec, data=mas)
```

Fligner-Killeen:med chi-squared = 0.027668, df = 1, p-value = 0.8679

```
> wilcox.test(larva.develop ~ tec, data=mas)
```

W = 2883.5, p-value = 0.1538

### Pupa Recovery

Summary

```
> group_by(mas_join, tec) %>%
+ summarise(
```

```

+   count = n(),
+   mean = mean(pupae_prc_hatching, na.rm = TRUE),
+   sd = sd(pupae_prc_hatching, na.rm = TRUE),
+   median = median(pupae_prc_hatching, na.rm = TRUE),
+   IQR = IQR(pupae_prc_hatching, na.rm = TRUE))

```

A tibble: 2 x 6

|   | tec   | count | mean  | sd    | median | IQR   |
|---|-------|-------|-------|-------|--------|-------|
|   | <fct> | <int> | <dbl> | <dbl> | <dbl>  | <dbl> |
| 1 | net   | 95    | 56.5  | 21.7  | 58.6   | 33.1  |
| 2 | wax   | 94    | 63.5  | 17.1  | 66.7   | 23.2  |

Descriptive analyses

WAX

```

> mas_join_wax = mas_join[mas_join$tec == "wax",]
> ggplot(data = mas_join_wax,
+   aes(x = day_diff, y = pupae, color = as.factor(block), size = 0.1))
+   ggtitle("wax cage pupae recovery by blocks and date") +
+   geom_line()+
+   geom_point()

```

Wax cage pupae recovery by blocks and date

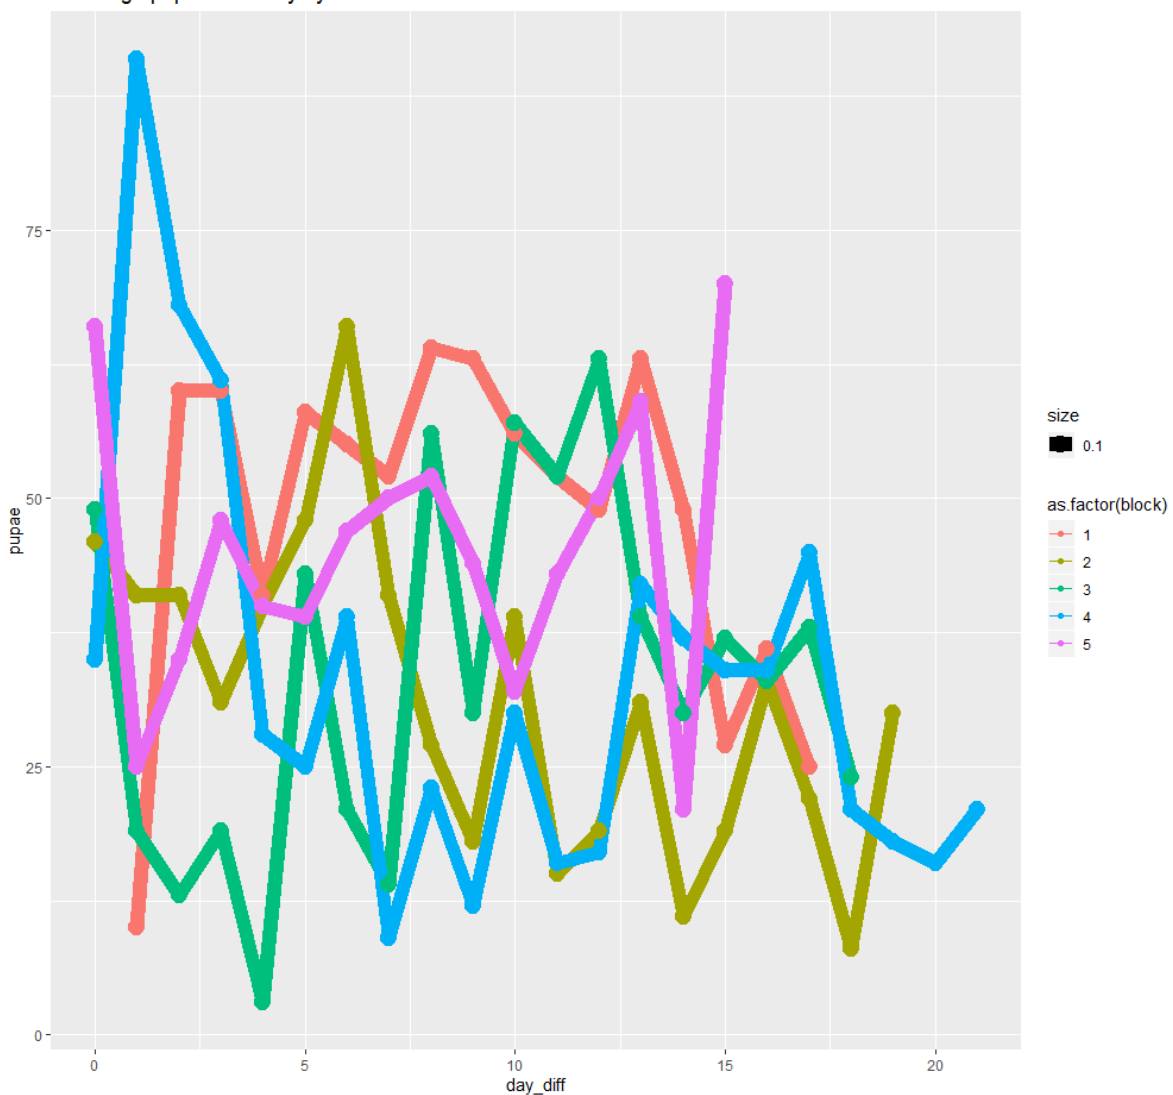

NET

```

> mas_join_net = mas_join[mas_join$tec == "net",]
> ggplot(data = mas_join_net,

```



```

+ aes(x = day_diff, y = pupae_prc_hatching, color = as.factor(block),
size =0.1)) +
+ ggtitle("Net cage pupae recovery by blocks and date") +
+ geom_line()+
+ geom_point()

```

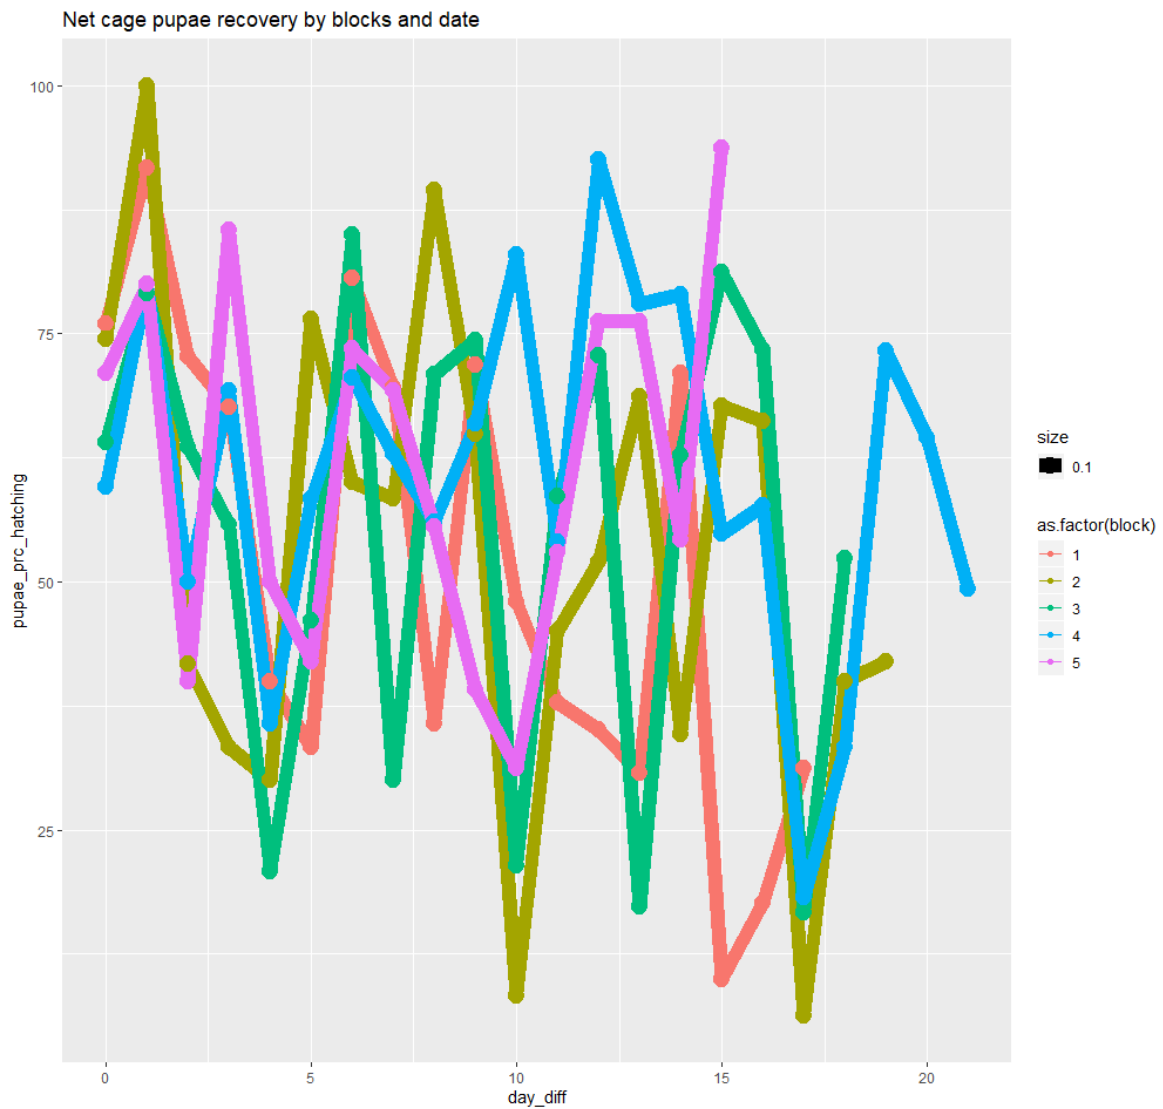

```

net and wax per all replicas
> boxplot(mas_join$pupae_prc_hatching~mas_join$tec, data= mas_join,
col=c("darkcyan", "chocolate1"),xlab="Cage type",
+ ylab="Pupae recover (%)")

```

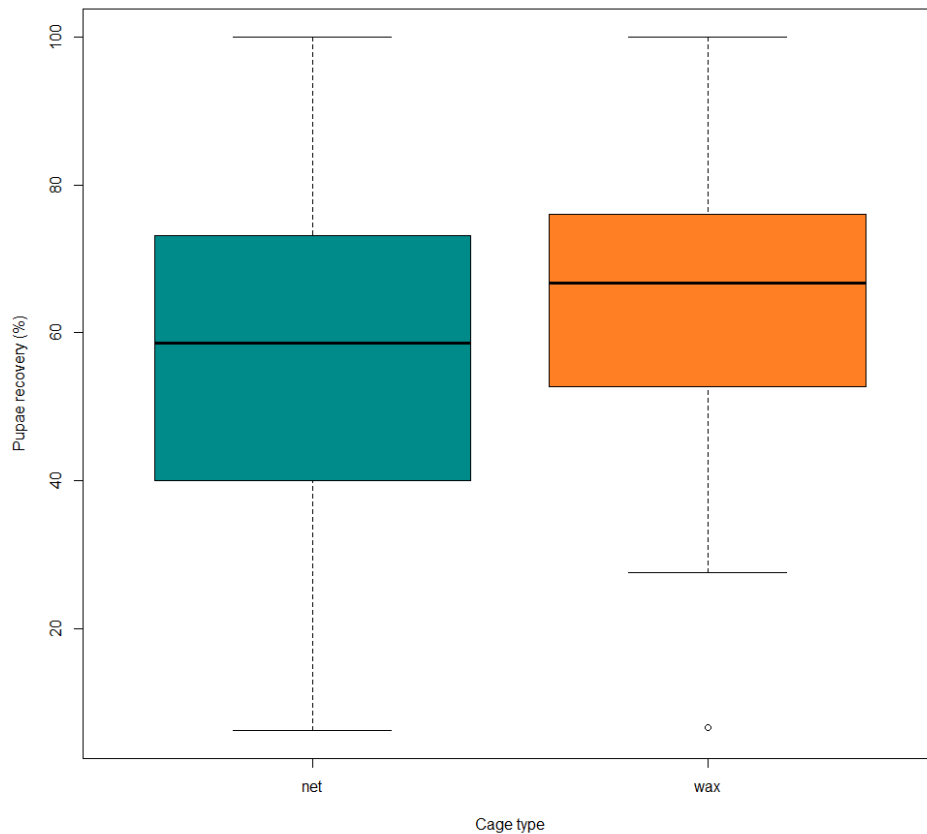

Fit model

```
> model_0pup = lme(pupae_prc_hatching~ as.numeric(day_diff) + tec, random = ~1|block, data = mas_join)
```

```
> summary(model_0pup)
```

Linear mixed-effects model fit by REML

Data: mas\_join

|  | AIC      | BIC      | logLik    |
|--|----------|----------|-----------|
|  | 1651.469 | 1667.598 | -820.7345 |

Random effects:

Formula: ~1 | block

(Intercept) Residual

StdDev: 0.001252427 19.02539

Fixed effects: pupae\_prc\_hatching ~ as.numeric(day\_diff) + tec

|                      | Value    | Std.Error | DF  | t-value   | p-value |
|----------------------|----------|-----------|-----|-----------|---------|
| (Intercept)          | 63.97564 | 2.9692740 | 182 | 21.545886 | 0.0000  |
| as.numeric(day_diff) | -0.82645 | 0.2457375 | 182 | -3.363126 | 0.0009  |
| tecwax               | 7.15049  | 2.7679282 | 182 | 2.583335  | 0.0106  |

Correlation:

|                      | (Intr) | as.(_) |
|----------------------|--------|--------|
| as.numeric(day_diff) | -0.754 |        |
| tecwax               | -0.457 | -0.009 |

Standardized within-Group Residuals:

| Min        | Q1         | Med       | Q3        | Max       |
|------------|------------|-----------|-----------|-----------|
| -3.2141438 | -0.6791105 | 0.1636694 | 0.7609182 | 2.2165668 |

Number of Observations: 189

```

Number of Groups: 5
Best fitted model including days
> model_3pup = lme(pupae_prc_hatching~ poly(as.numeric(day_diff),1) + tec,
+               random = ~1|block,
+               data = mas_join,
+               method = "ML")
> summary(model_3pup)
Linear mixed-effects model fit by maximum likelihood
Data: mas_join
      AIC      BIC    logLik
1656.837 1673.046 -823.4187

Random effects:
Formula: ~1 | block
      (Intercept) Residual
StdDev: 0.001087222 18.87379

Fixed effects: pupae_prc_hatching ~ poly(as.numeric(day_diff), 1) + tec
              Value Std.Error DF   t-value p-value
(Intercept)    56.41082   1.952000 182  28.898986  0.0000
poly(as.numeric(day_diff), 1) -63.98716  19.026095 182  -3.363126  0.0009
tecwax          7.15049   2.767928 182   2.583335  0.0106
Correlation:
              (Intr) p(._1
poly(as.numeric(day_diff), 1)  0.006
tecwax                       -0.705 -0.009

Standardized Within-Group Residuals:
      Min      Q1      Med      Q3      Max
-3.2399606 -0.6845652  0.1649840  0.7670301  2.2343708

Number of Observations: 189
Number of Groups: 5
> data_predicted = mas_join
> data_predicted$predictions = predict(model_3pup)
> ggplot(data = data_predicted,
+        aes(x = day_diff, y = predictions, color = as.factor(tec), size
=0.1)) +
+   ggtitle("Pupae recovery by treatment and date") +
+   geom_line() +
+   geom_line(aes(day_diff, pupae_prc_hatching, colour=tec),
df_means_in_time)

```

Pupae recovery by treatment and date

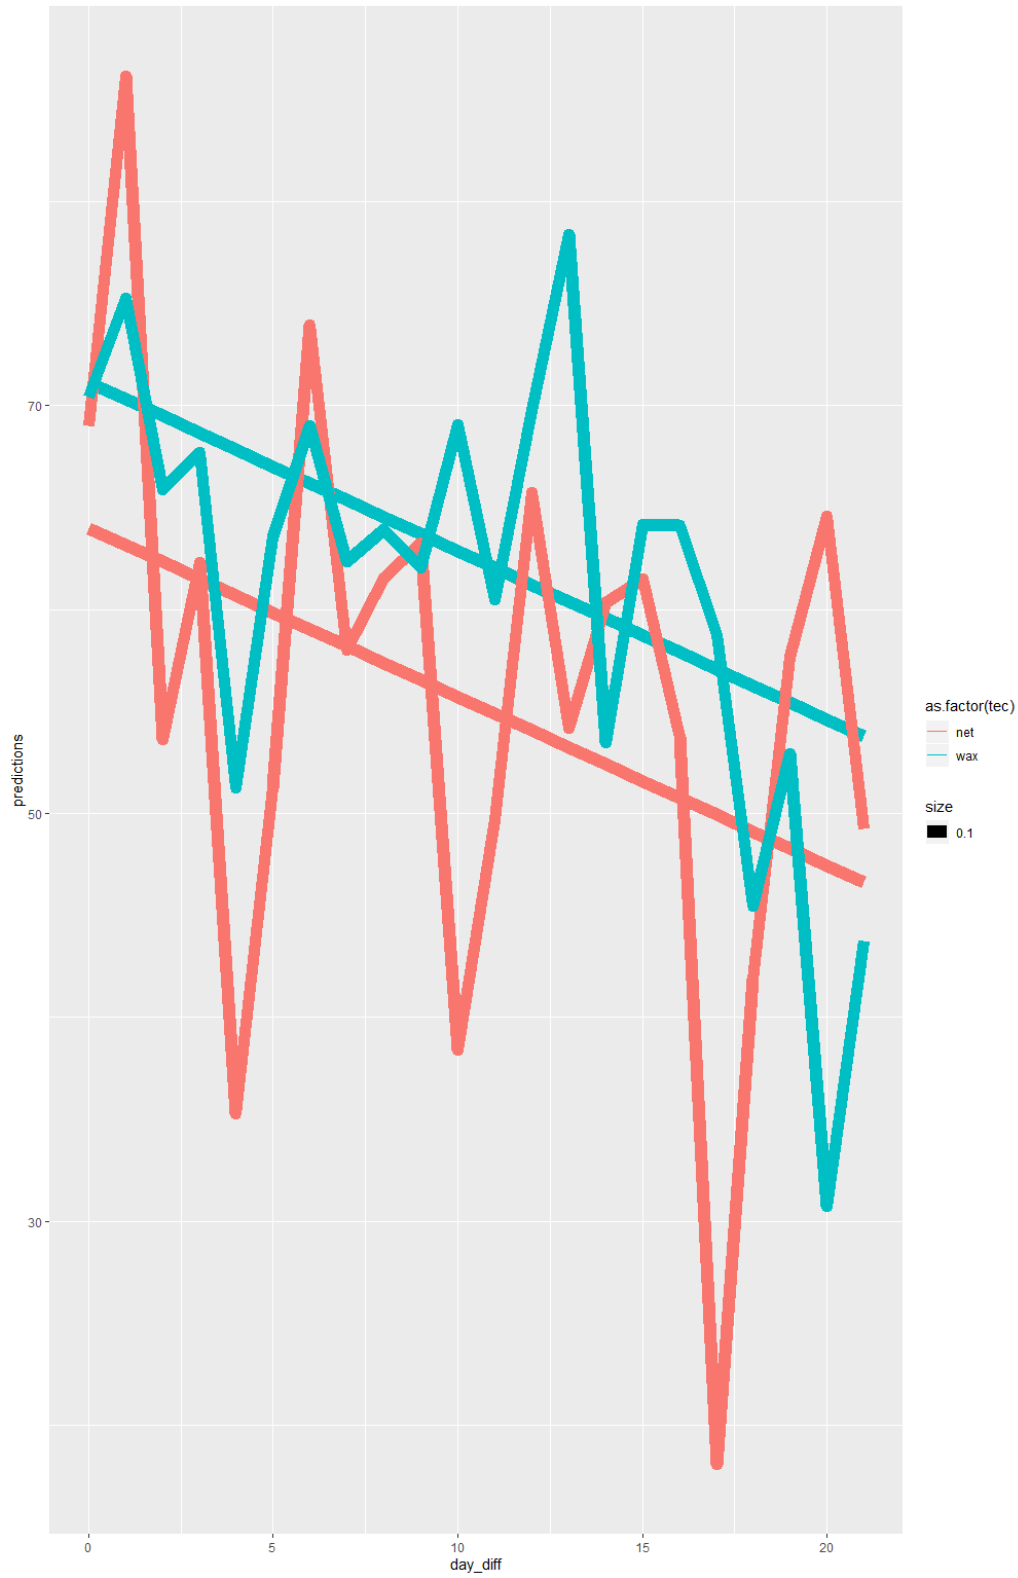

```
> lsmeans(model_3pup, pairwise ~ tec)
```

```
$lsmeans
```

| tec | lsmean | SE   | df | lower.CL | upper.CL |
|-----|--------|------|----|----------|----------|
| net | 56.4   | 1.95 | 4  | 51.0     | 61.8     |
| wax | 63.6   | 1.96 | 4  | 58.1     | 69.0     |

```
d.f. method: containment
```

Confidence level used: 0.95

\$contrasts

| contrast  | estimate | SE   | df  | t.ratio | p.value |
|-----------|----------|------|-----|---------|---------|
| net - wax | -7.15    | 2.77 | 182 | -2.583  | 0.0106  |

```
> comp_m1 <- emmeans(model_3pup, ~tec)
```

```
> CLD(comp_m1)
```

| tec | emmean | SE   | df | lower.CL | upper.CL | .group |
|-----|--------|------|----|----------|----------|--------|
| net | 56.4   | 1.95 | 4  | 51.0     | 61.8     | 1      |
| wax | 63.6   | 1.96 | 4  | 58.1     | 69.0     | 2      |

d.f. method: containment

Confidence level used: 0.95

significance level used: alpha = 0.05

Homoscedasticity

```
> plot(model_3pup)
```

```
> intervals(model_3pup, which = "fixed")
```

Approximate 95% confidence intervals

Fixed effects:

|                               | lower       | est.       | upper     |
|-------------------------------|-------------|------------|-----------|
| (Intercept)                   | 52.590046   | 56.410817  | 60.23159  |
| poly(as.numeric(day_diff), 1) | -101.228118 | -63.987163 | -26.74621 |
| tecwax                        | 1.732648    | 7.150486   | 12.56832  |

```
attr(,"label")
```

```
[1] "Fixed effects:"
```

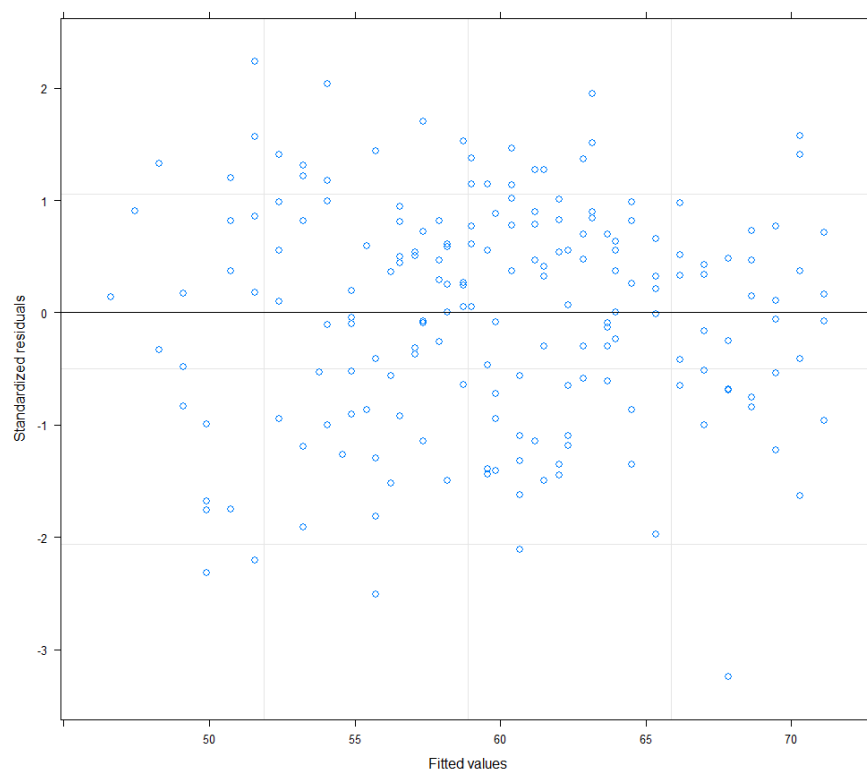

Normality

```
> res = model_3pup$residuals
```

```
> ggplot(data = resid(model_3pup))
```

```
> hist(, breaks = 20)
```

```
> qqnorm(resid(model_3pup))
```

```
> qqline(resid(model_3pup))
```

```
> qqplot(res[,1])
> qqplot(model_3pup$residuals)
```

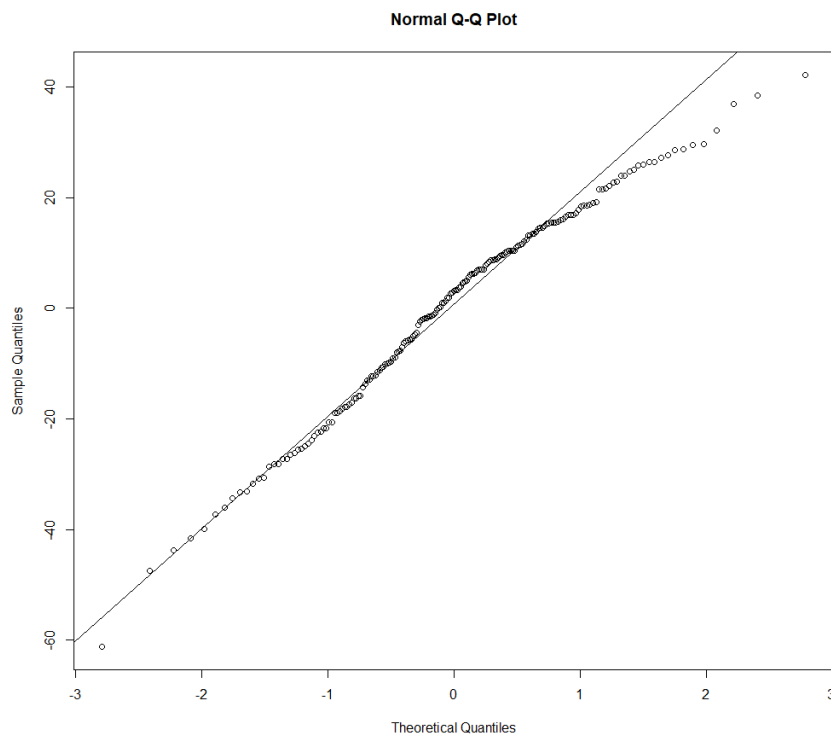

```
> shapiro.test(model_3pup$residuals)
Shapiro-wilk normality test
data:  model_3pup$residuals
W = 0.98146, p-value = 8.9e-05
```

```
> kruskal.test (pupae_prc_hatching ~ tec, data=mas_join)
Kruskal-wallis chi-squared = 4.538, df = 1, p-value = 0.03315
```

## Adult Production

Summary

```
> group_by(mas_join, tec) %>%
+ summarise(
+   count = n(),
+   mean = mean(adult_prc_hatch, na.rm = TRUE),
+   sd = sd(adult_prc_hatch, na.rm = TRUE),
+   median = median(adult_prc_hatch, na.rm = TRUE),
+   IQR = IQR(adult_prc_hatch, na.rm = TRUE))
```

# A tibble: 2 x 6

| tec   | count | mean  | sd    | median | IQR   |
|-------|-------|-------|-------|--------|-------|
| <fct> | <int> | <dbl> | <dbl> | <dbl>  | <dbl> |
| 1 net | 95    | 50.4  | 21.6  | 52.4   | 28.4  |
| 2 wax | 94    | 56.9  | 16.3  | 59.1   | 19.2  |

Descriptive analyses

WAX

```
> mas_join_wax = mas_join[mas_join$tec == "wax",]
> ggplot(data = mas_join_wax,
+   aes(x = day_diff, y = adult_prc_hatch, color = as.factor(block),
+   size = 0.1)) +
+   ggtitle("wax treatment adult_prc_hatch per experiment by blocks and
+   date") +
+   geom_line()+
+   geom_point()
```

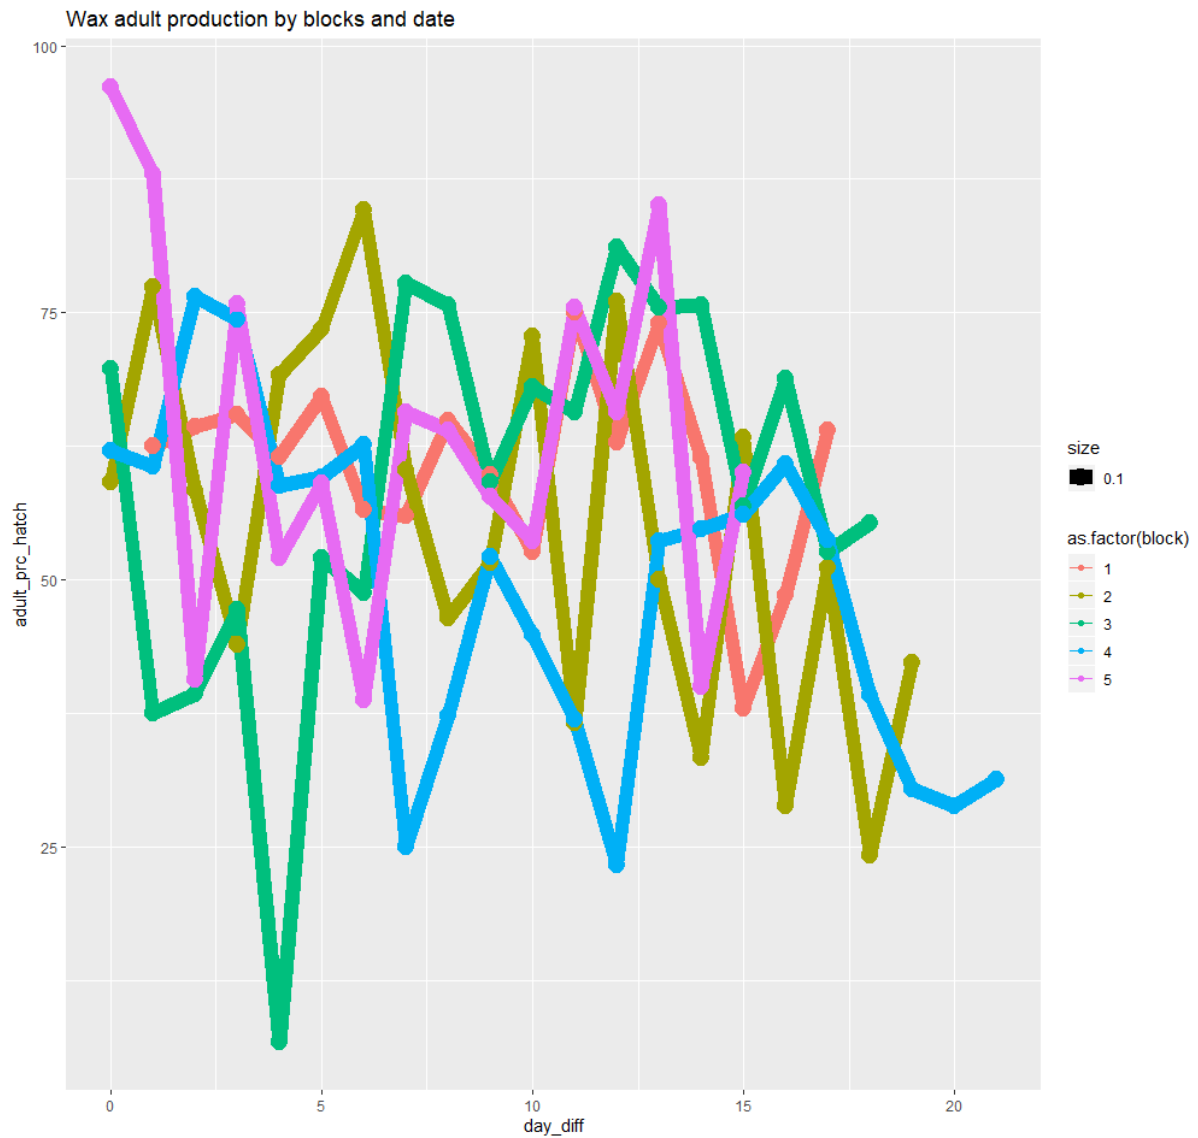

```
NET
> mas_join_net = mas_join[mas_join$tec == "net",]
> ggplot(data = mas_join_net,
+       aes(x = day_diff, y = adult_prc_hatch, color = as.factor(block),
+       size = 0.1)) +
+   ggtitle("Net adult production by blocks and date") +
+   geom_line()+
+   geom_point()
```

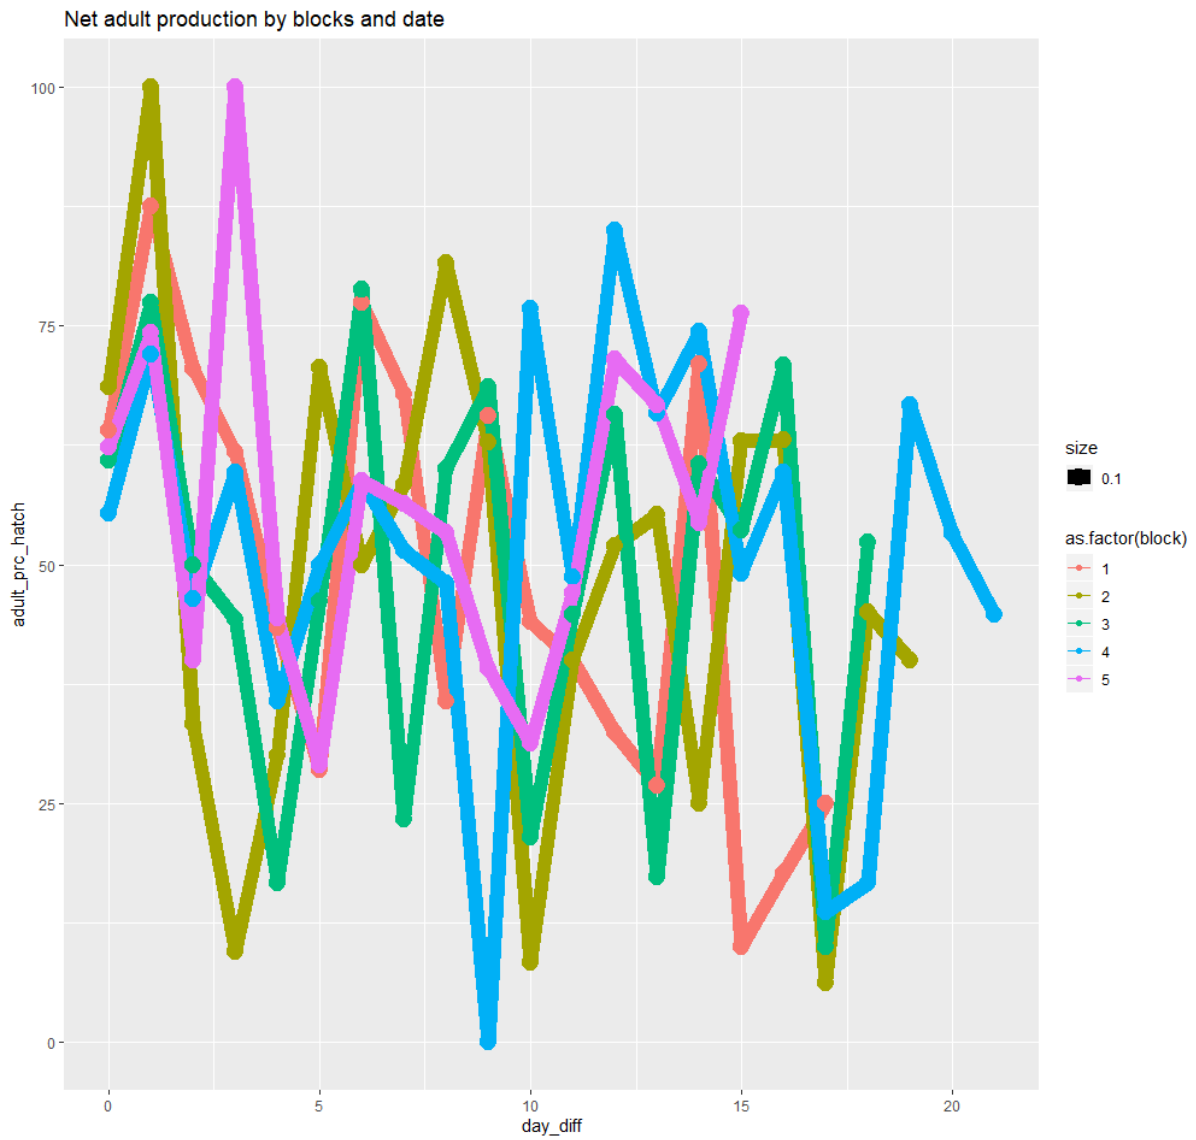

```
net and wax per all replicas
> boxplot(mas_join$adult_prc_hatch~mas_join$tec, data= mas_join,
col=c("darkcyan", "chocolate1"),xlab="Cage type",
+ ylab="Adult production (%)")
```



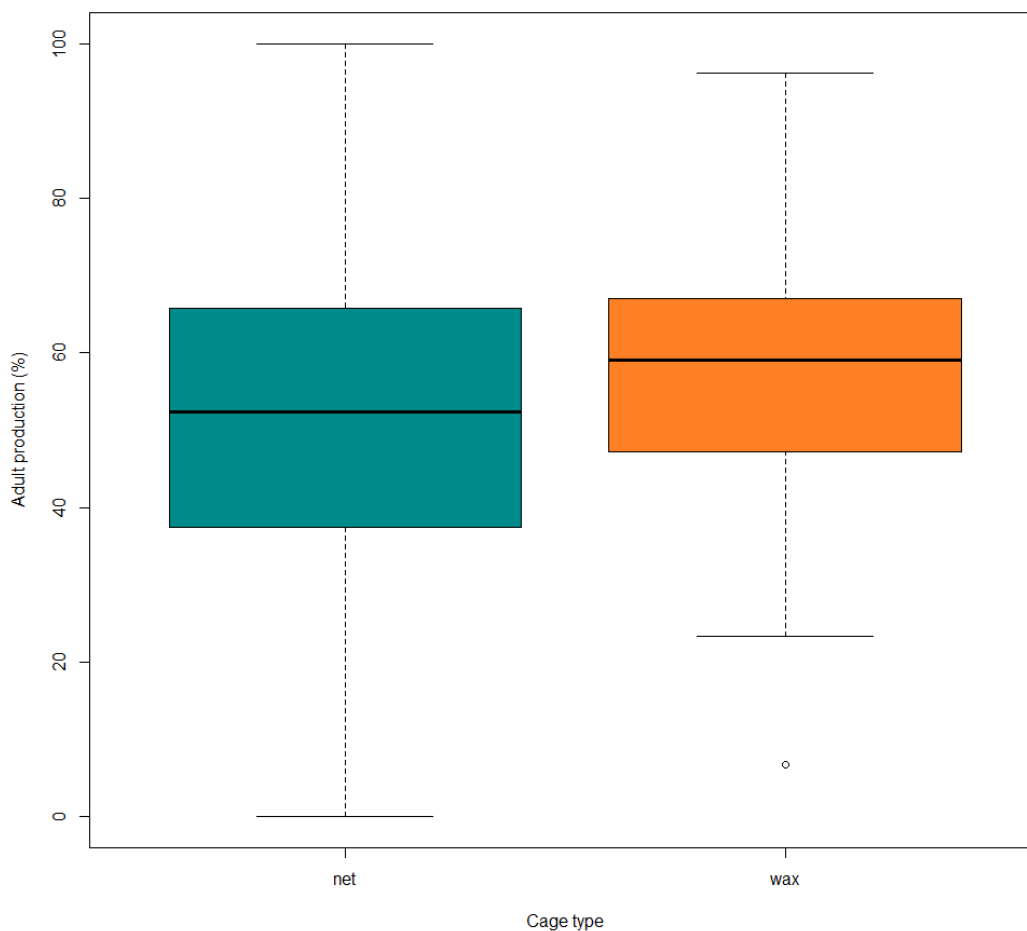

#### Fit Model

```
> model_0adult_prc_hatch = lme(adult_prc_hatch~ as.numeric(day_diff) + tec,
random = ~1|block,+ data = mas_join)
> summary(model_0adult_prc_hatch)
Linear mixed-effects model fit by REML
Data: mas_join
      AIC      BIC    logLik
1641.382 1657.51 -815.6908
```

#### Random effects:

```
Formula: ~1 | block
(Intercept) Residual
StdDev: 0.001506003 18.51642
```

#### Fixed effects: adult\_prc\_hatch ~ as.numeric(day\_diff) + tec

|                      | Value    | Std. Error | DF  | t-value   | p-value |
|----------------------|----------|------------|-----|-----------|---------|
| (Intercept)          | 58.56424 | 2.8898399  | 182 | 20.265565 | 0.0000  |
| as.numeric(day_diff) | -0.89352 | 0.2391635  | 182 | -3.736012 | 0.0003  |
| tecwax               | 6.58462  | 2.6938805  | 182 | 2.444288  | 0.0155  |

#### Correlation:

|                      | (Intr) | as.(_) |
|----------------------|--------|--------|
| as.numeric(day_diff) | -0.754 |        |
| tecwax               | -0.457 | -0.009 |

#### Standardized within-Group Residuals:

| Min        | Q1         | Med       | Q3        | Max       |
|------------|------------|-----------|-----------|-----------|
| -2.9651941 | -0.6248895 | 0.1119438 | 0.7077317 | 2.3825505 |

Number of Observations: 189  
Number of Groups: 5

Fit model including days

```
> model_3adult_prc_hatch = lme(adult_prc_hatch~  
poly(as.numeric(day_diff),2) + tec, +random = ~1|block,+ data = mas_join)  
> summary(model_3adult_prc_hatch)  
Linear mixed-effects model fit by REML  
Data: mas_join  
      AIC      BIC    logLik  
1626.941 1646.263 -807.4705
```

Random effects:

```
Formula: ~1 | block  
(Intercept) Residual  
StdDev: 0.001375626 18.56319
```

Fixed effects: adult\_prc\_hatch ~ poly(as.numeric(day\_diff), 2) + tec

|                                | Value     | Std.Error | DF  | t-value   | p-value |
|--------------------------------|-----------|-----------|-----|-----------|---------|
| (Intercept)                    | 50.38886  | 1.904624  | 181 | 26.456059 | 0.0000  |
| poly(as.numeric(day_diff), 2)1 | -69.17974 | 18.563872 | 181 | -3.726579 | 0.0003  |
| poly(as.numeric(day_diff), 2)2 | -4.69937  | 18.564101 | 181 | -0.253143 | 0.8004  |
| tecwax                         | 6.57783   | 2.700817  | 181 | 2.435497  | 0.0158  |

Correlation:

|                                | (Intr) | p(.(.),2)1 | p(.(.),2)2 |
|--------------------------------|--------|------------|------------|
| poly(as.numeric(day_diff), 2)1 | 0.006  |            |            |
| poly(as.numeric(day_diff), 2)2 | -0.007 | 0.000      |            |
| tecwax                         | -0.705 | -0.009     | 0.010      |

Standardized within-Group Residuals:

| Min         | Q1          | Med        | Q3         | Max        |
|-------------|-------------|------------|------------|------------|
| -2.95885523 | -0.63203011 | 0.09280197 | 0.72430598 | 2.38221337 |

Number of Observations: 189

Number of Groups: 5

```
> lsmeans(model_3adult_prc_hatch, pairwise ~ tec) comparisons of groups  
$lsmeans  
tec lsmean SE df lower.CL upper.CL  
net 50.7 2.37 4 44.2 57.3  
wax 57.3 2.36 4 50.8 63.9
```

d.f. method: containment

Confidence level used: 0.95

\$contrasts

| contrast  | estimate | SE  | df  | t.ratio | p.value |
|-----------|----------|-----|-----|---------|---------|
| net - wax | -6.58    | 2.7 | 181 | -2.435  | 0.0158  |

```
> comp_m1 <- emmeans(model_3adult_prc_hatch, ~tec)
```

```
> CLD(comp_m1)
```

| tec | emmean | SE   | df | lower.CL | upper.CL | .group |
|-----|--------|------|----|----------|----------|--------|
| net | 50.7   | 2.37 | 4  | 44.2     | 57.3     | 1      |
| wax | 57.3   | 2.36 | 4  | 50.8     | 63.9     | 2      |

d.f. method: containment

Confidence level used: 0.95

significance level used: alpha = 0.05

```
> data_predicted = mas_join
```

```

> data_predicted$predictions = predict(model_3adult_prc_hatch, newdata =
mas_join)
> df_means_in_time_pred = aggregate(data_predicted$predictions, by =
list(data_predicted$day_diff,data_predicted$tec ), FUN = mean)

> df_means_in_time = aggregate(mas_join$adult_prc_hatch, by =
list(mas_join$day_diff,mas_join$tec ), FUN = mean)
> names(df_means_in_time) <- c("day_diff", "tec", "adult_prc_hatch")

> ggplot(data = df_means_in_time_pred,
+ aes(x = day_diff, y = predictions, color = as.factor(tec), size
=0.1)) +
+ ggtitle("Fit model for adult production by cage and date") +
+ geom_line() +
+ geom_line(aes(day_diff, adult_prc_hatch, colour=tec), df_means_in_time)
Fit model for adult production by cage and date

```

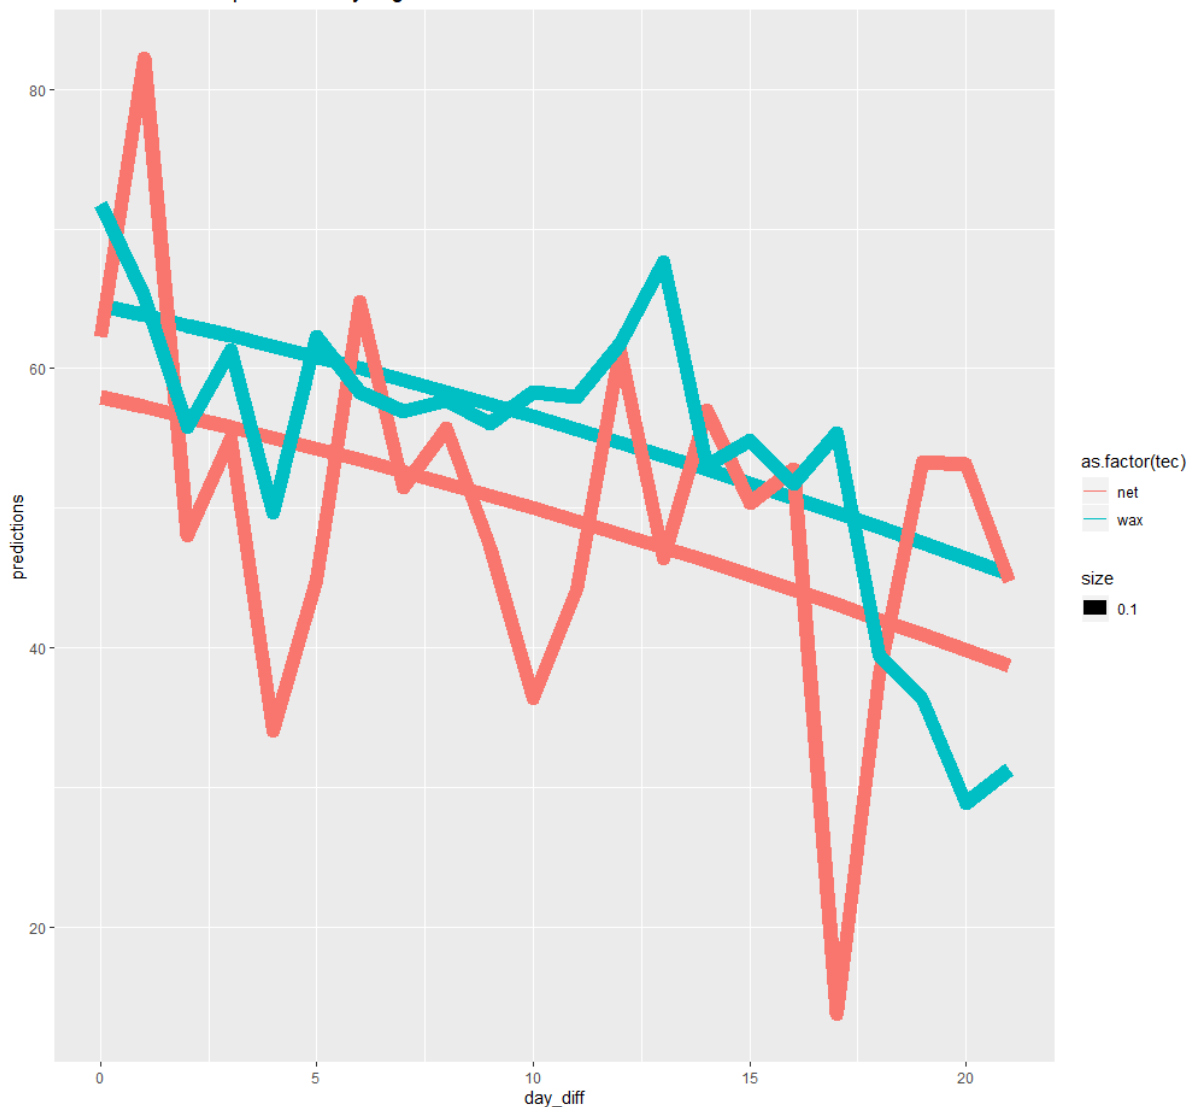

```

> model_3adult_prc_hatch$coefficients
$fixed
              (Intercept)      poly(as.numeric(day_diff),      2)1
poly(as.numeric(day_diff), 2)2      -69.179741      -
4.699373
              tecwax
              6.577830

```

```

$random
$random$block
  (Intercept)
1  7.246706e-08
2 -3.785584e-07
3 -5.286917e-08
4 -4.919520e-07
5  8.509125e-07

```

Homoscedasticity

```

> plot(model_3adult_prc_hatch)
> intervals(model_3adult_prc_hatch, which = "fixed")
Approximate 95% confidence intervals

```

Fixed effects:

|                                | lower       | est.       | upper     |
|--------------------------------|-------------|------------|-----------|
| (Intercept)                    | 46.670715   | 50.388857  | 54.10700  |
| poly(as.numeric(day_diff), 2)1 | -105.419490 | -69.179741 | -32.93999 |
| poly(as.numeric(day_diff), 2)2 | -40.939568  | -4.699373  | 31.54082  |
| tecwax                         | 1.305389    | 6.577830   | 11.85027  |

```

attr("label")
[1] "Fixed effects:"

```

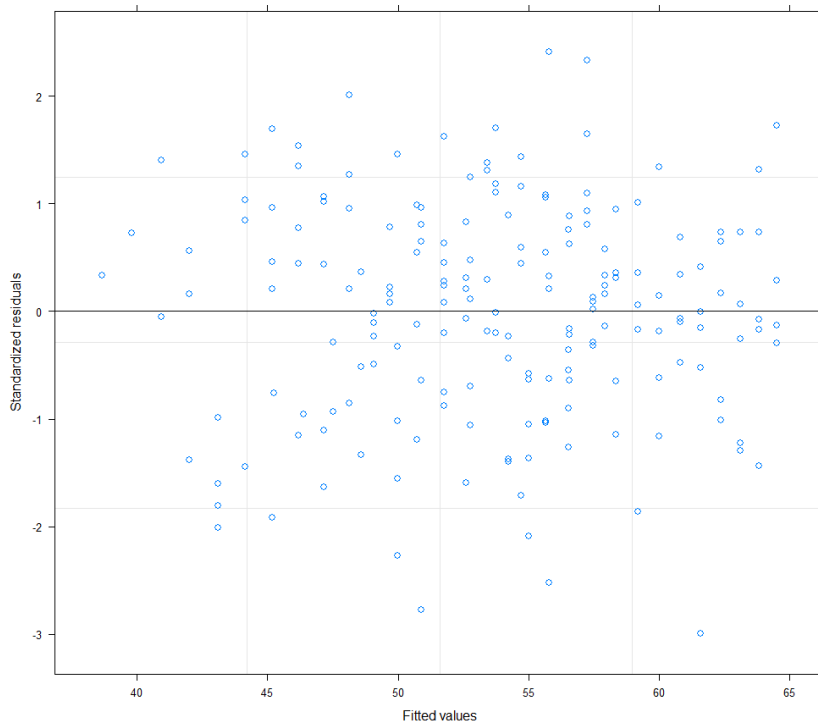

Normality

```

> res = model_3adult_prc_hatch$residuals
> ggplot(data = resid(model_3adult_prc_hatch))
> hist(, breaks = 20)
> qqnorm(resid(model_3adult_prc_hatch))
> qqline(resid(model_3adult_prc_hatch))
> qqplot(res[,1])
> qqplot(model_3adult_prc_hatch$residuals)

```

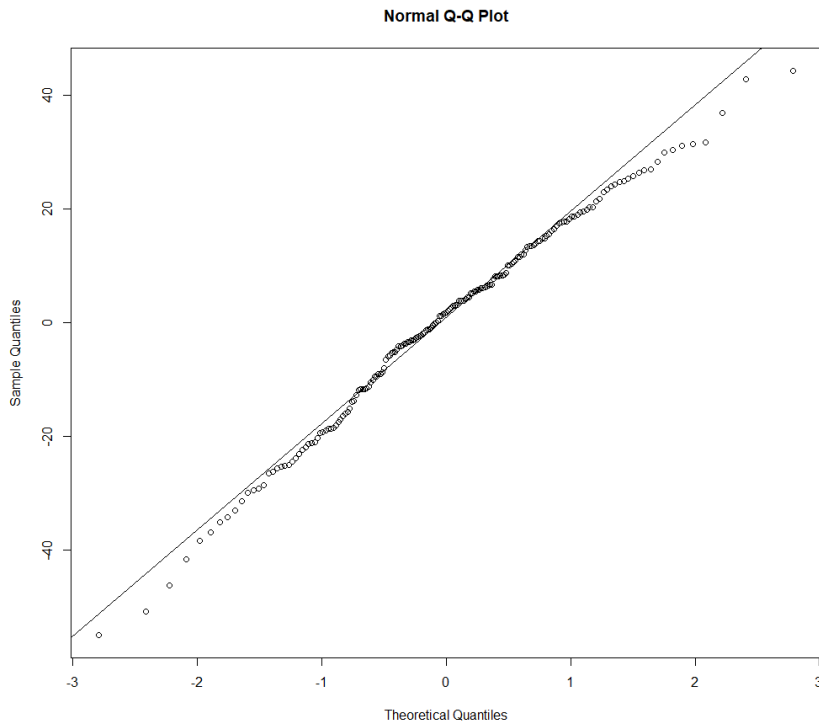

```
> shapiro.test(model_3adult_prc_hatch$residuals)
shapiro-wilk normality test
```

```
data: model_3adult_prc_hatch$residuals
W = 0.98611, p-value = 0.001094
```

```
> kruskal.test (adult_prc_hatch ~ tec, data=mas_join)
kruskal-wallis chi-squared = 4.0692, df = 1, p-value = 0.04367
```

## Qc parameters

### Emergence

#### Summary

```
> group_by(mas, tec) %>%
  summarise(
    count = n(),
    mean = mean(emerger_prc, na.rm = TRUE),
    sd = sd(emerger_prc, na.rm = TRUE),
    median = median(emerger_prc, na.rm = TRUE),
    IQR = IQR(emerger_prc, na.rm = TRUE))
```

A tibble: 2 x 6

| tec   | count | mean  | sd    | median | IQR   |
|-------|-------|-------|-------|--------|-------|
| <fct> | <int> | <dbl> | <dbl> | <dbl>  | <dbl> |
| 1 net | 95    | 74.9  | 21.2  | 80     | 30    |
| 2 wax | 95    | 85.5  | 12.5  | 90     | 20    |

## Descriptive analyses

### WAX

```
> ggplot(data = mas2_join_net,
+         aes(x = daycount, y = eme2, color = as.factor(block), size = 0.1))
+   ggtitle()+
+   geom_point()+ xlab("Day count") +
+   ylab("Emergence (%)")
```

```
Error in labs(title = label, subtitle = subtitle) :
  argument "label" is missing, with no default
```

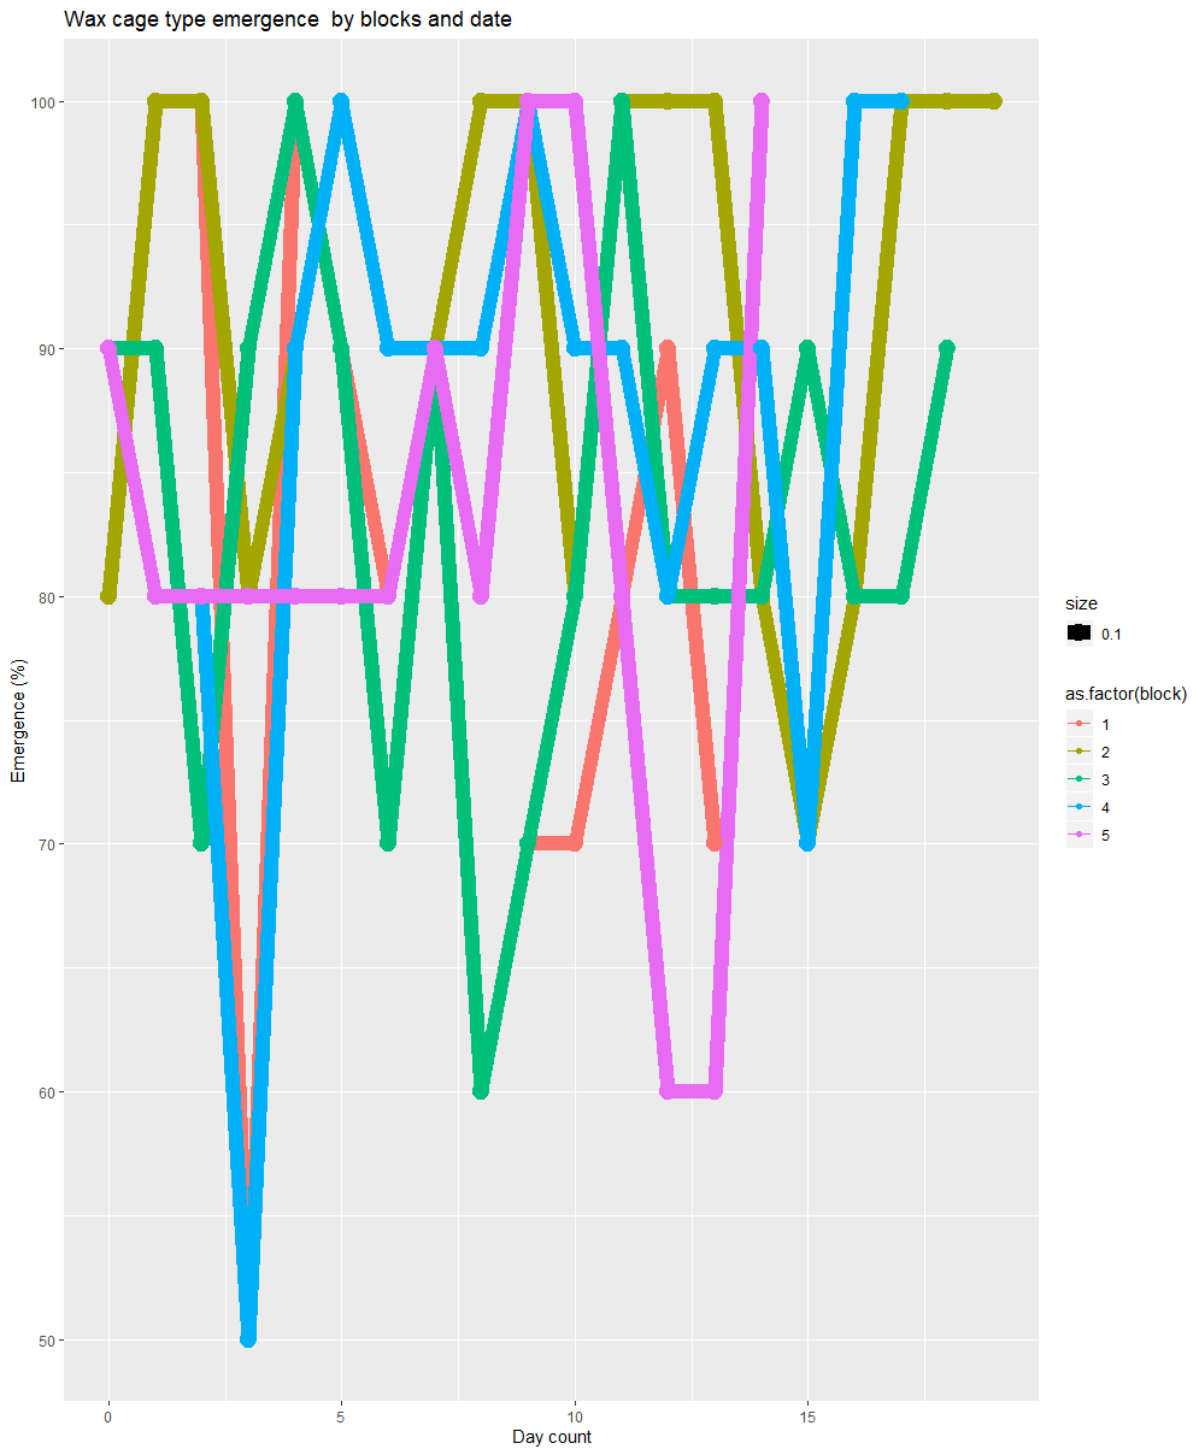

NET

```

> ggplot(data = mas2_join_net,
+       aes(x = daycount, y = eme2, color = as.factor(block), size = 0.1))
+
+   ggtitle("Net cage type emergence by blocks and date") +
+   geom_line()+
+   geom_point()+ xlab("Day count") +
+   ylab("Emergence (%)")

```

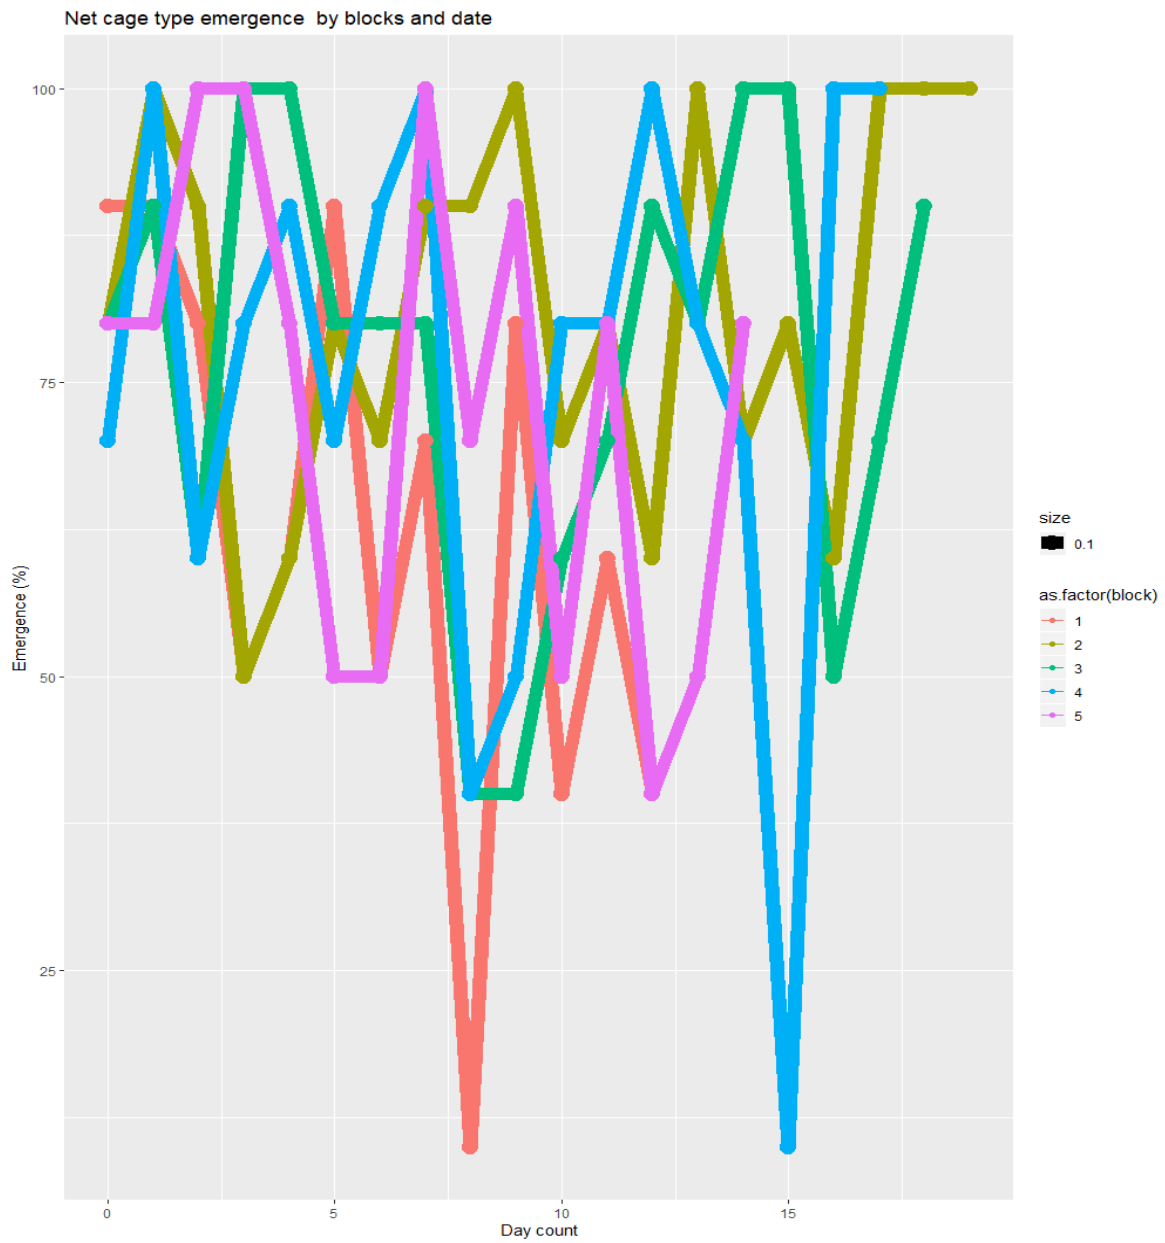

```
> boxplot(mas2$eme2~mas2$tec, data= mas2, col=c("darkcyan", "chocolate1"),
+         xlab="Cage type",
+         ylab="Emergence (%)")
```

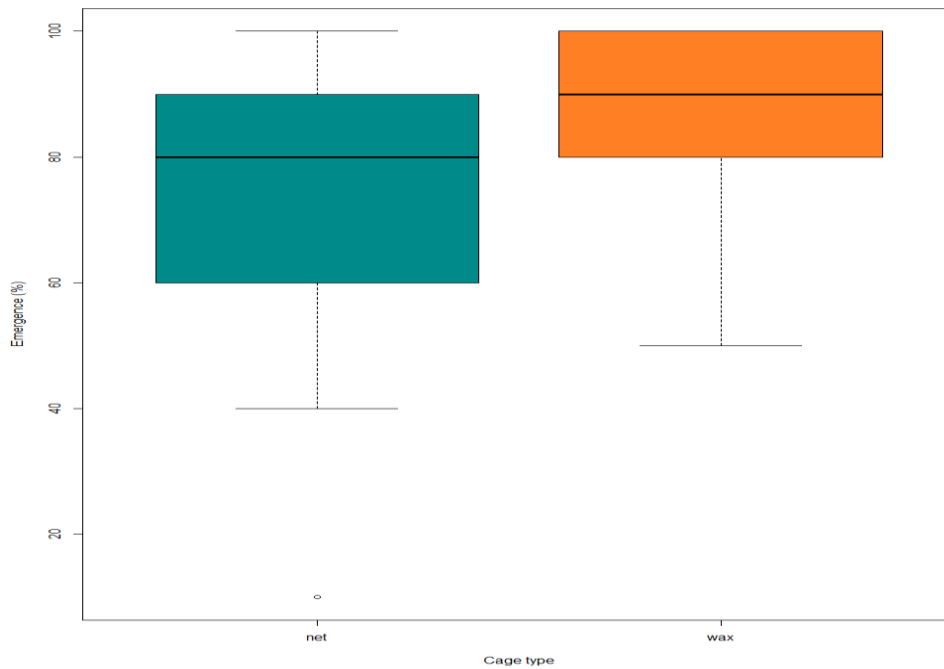

Fit model

```
> model_1 = lme(eme2~ daycount + tec, random = ~1|block,
+               data = mas2_join, method = "ML")
> summary(model_1)
```

Linear mixed-effects model fit by maximum likelihood

Data: mas2\_join

|  | AIC      | BIC     | logLik    |
|--|----------|---------|-----------|
|  | 1449.701 | 1465.35 | -719.8503 |

Random effects:

Formula: ~1 | block

(Intercept) Residual

StdDev: 4.348466 16.83005

Fixed effects: eme2 ~ daycount + tec

|             | Value    | Std.Error | DF  | t-value   | p-value |
|-------------|----------|-----------|-----|-----------|---------|
| (Intercept) | 75.55734 | 3.400499  | 162 | 22.219485 | 0.0000  |
| daycount    | -0.13760 | 0.256092  | 162 | -0.537290 | 0.5918  |
| tecwax      | 10.49300 | 2.613397  | 162 | 4.015081  | 0.0001  |

Correlation:

(Intr) daycnt

daycount -0.609

tecwax -0.368 -0.022

Standardized within-Group Residuals:

|  | Min        | Q1         | Med       | Q3        | Max       |
|--|------------|------------|-----------|-----------|-----------|
|  | -3.8578984 | -0.5356895 | 0.2066319 | 0.6542872 | 1.5824974 |

Number of Observations: 169

Number of Groups: 5

Best fitted model



```

> model_3 = lme(eme2 ~ tec,
+               random = ~1|block,
+               data = mas2_join, method = "ML")
> summary(model_3)
Linear mixed-effects model fit by maximum likelihood
Data: mas2_join
      AIC      BIC    logLik
1447.987 1460.507 -719.9935

Random effects:
Formula: ~1 | block
      (Intercept) Residual
StdDev:    4.177216 16.8585

Fixed effects: eme2 ~ tec
              Value Std.Error DF   t-value p-value
(Intercept) 74.45847  2.635225 163 28.255068  0e+00
tecwax      10.46381  2.609308 163  4.010184  1e-04
Correlation:
      (Intr)
tecwax -0.492

Standardized within-Group Residuals:
      Min      Q1      Med      Q3      Max
-3.9042116 -0.5589838  0.2204854  0.6273616  1.5800396

Number of Observations: 169
Number of Groups: 5
> lsmeans(model_3, pairwise ~ tec) # comparisons of groups
$lsmeans
  tec lsmean   SE df lower.CL upper.CL
net  74.5 2.64  4    67.1    81.8
wax  84.9 2.64  4    77.6    92.3

d.f. method: containment
Confidence level used: 0.95

$contrasts
contrast estimate SE df t.ratio p.value
net - wax    -10.5 2.61 163 -4.010 0.0001

> comp_m1 <- emmeans(model_3, ~tec)
> CLD(comp_m1)
  tec emmean SE df lower.CL upper.CL .group
net  74.5 2.64  4    67.1    81.8  1
wax  84.9 2.64  4    77.6    92.3  2

d.f. method: containment
Confidence level used: 0.95
significance level used: alpha = 0.05
> data_predicted = mas2_join
> data_predicted$predictions = predict(model_3, newdata = mas2_join)
> df_means_in_time_pred = aggregate(data_predicted$predictions, by = list(d
ata_predicted$daycount,data_predicted$tec ), FUN = mean)

```

```

> names(df_means_in_time_pred) <- c("day_diff", "tec", "predictions")
> ggplot(data = data_predicted,
+       aes(x = daycount, y = predictions, color = as.factor(tec), size =
0.1)) +
+   ggtitle("Emergence per cage by blocks and date") +
+   geom_line() +
+   geom_line(aes(daycount, Emergence, colour=tec), df_means_in_time)

```

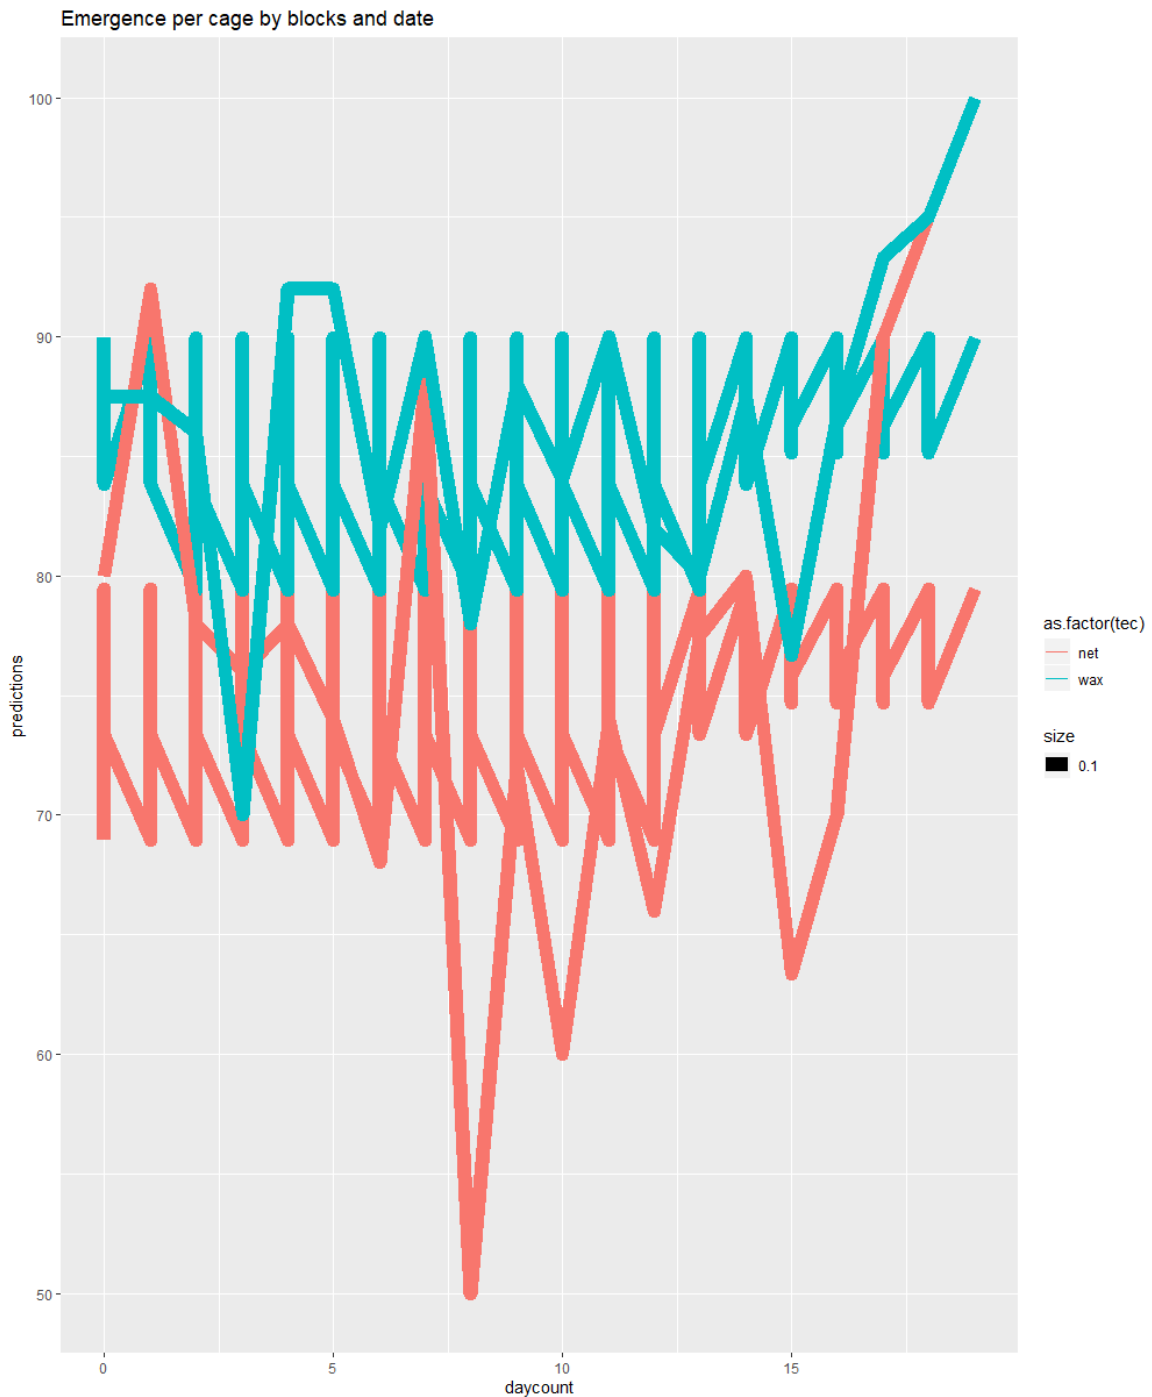

```

Homoscedasticity
> plot(model_3)

```

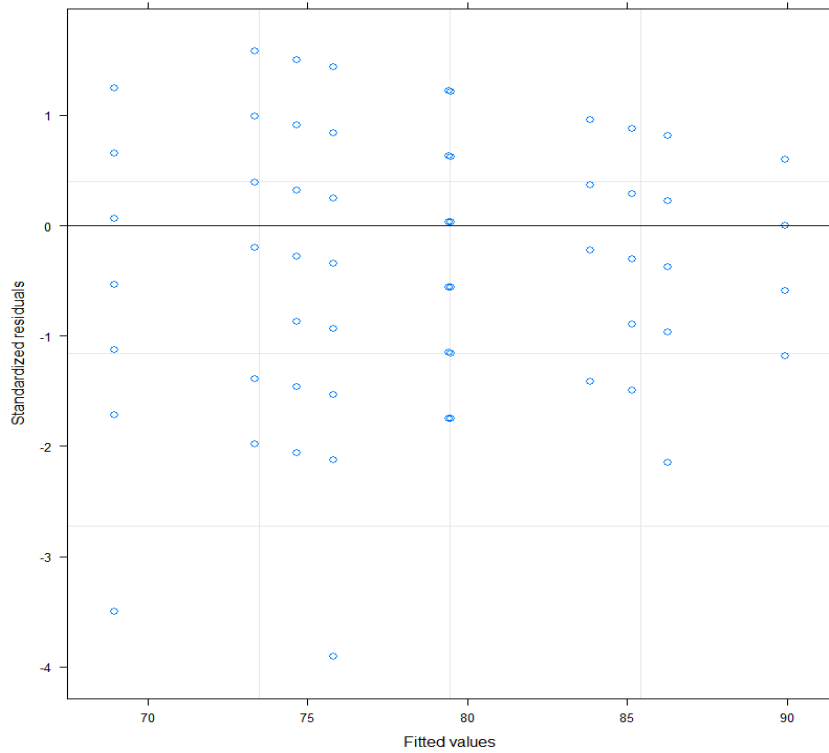

```
> intervals(model_3, which = "fixed")
Approximate 95% confidence intervals
```

Fixed effects:

|             | lower     | est.     | upper    |
|-------------|-----------|----------|----------|
| (Intercept) | 69.285769 | 74.45847 | 79.63117 |
| tecwax      | 5.341981  | 10.46381 | 15.58563 |

```
attr("label")
```

```
[1] "Fixed effects:"
```

Normality

```
> res = model_3$residuals
> ggplot(data = resid(model_3))
> qqnorm(resid(model_3))
> qqline(resid(model_3))
> qqplot(res[,1])
> qqplot(model_3$residuals)
```

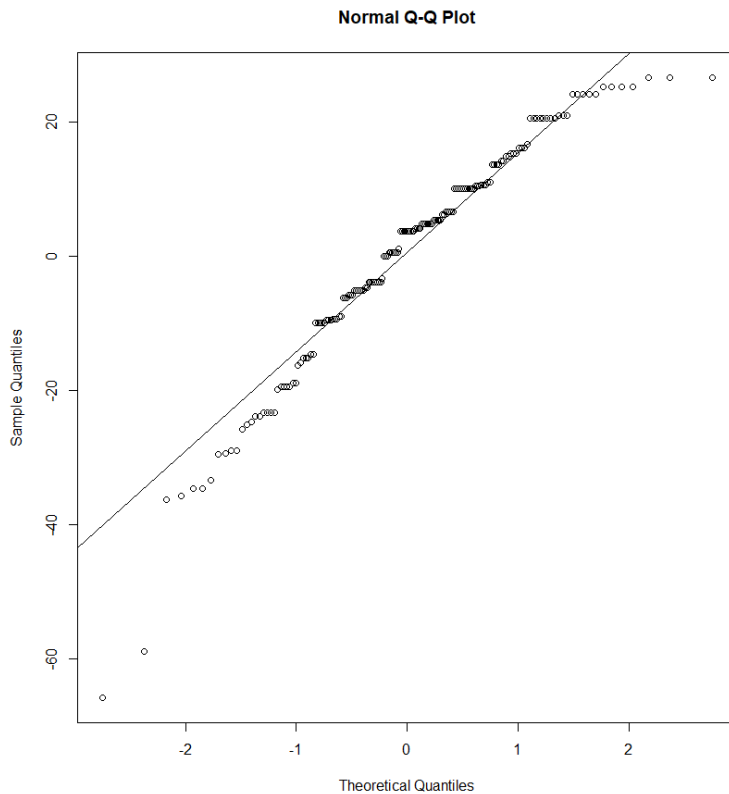

```
> shapiro.test(model_3$residuals)### n
Shapiro-wilk normality test
data: model_3$residuals
W = 0.9434, p-value = 4.453e-10
```

```
> kruskal.test (eme2 ~ tec, data=mas2_join) #
Kruskal-wallis chi-squared = 10.221, df = 1, p-value = 0.001388
```

## Flyers

```
> group_by(mas2, tec) %>%
+ summarise(
+   count = n(),
+   mean = mean(fly2, na.rm = TRUE),
+   sd = sd(fly2, na.rm = TRUE),
+   median = median(fly2, na.rm = TRUE),
+   IQR = IQR(fly2, na.rm = TRUE))
# A tibble: 2 x 6
  tec count mean sd median IQR
  <fct> <int> <dbl> <dbl> <dbl> <dbl>
1 net 85 66.5 24.1 70 40
2 wax 84 77.6 16.5 80 20
```

## Descriptive analyses

Wax

```
> mas2_join_wax = mas2[mas2$tec == "wax",]
> ggplot(data = mas2_join_wax,
+   aes(x = daycount, y = fly2 , color = as.factor(block), size =0.1)
+ ) +
+ ggtitle("Wax flyer by blocks and date") +
```

```

+ geom_line()+
+ geom_point()+ xlab("Day count") +
+ ylab("Flyer (%)")

```

Wax flyer by blocks and date

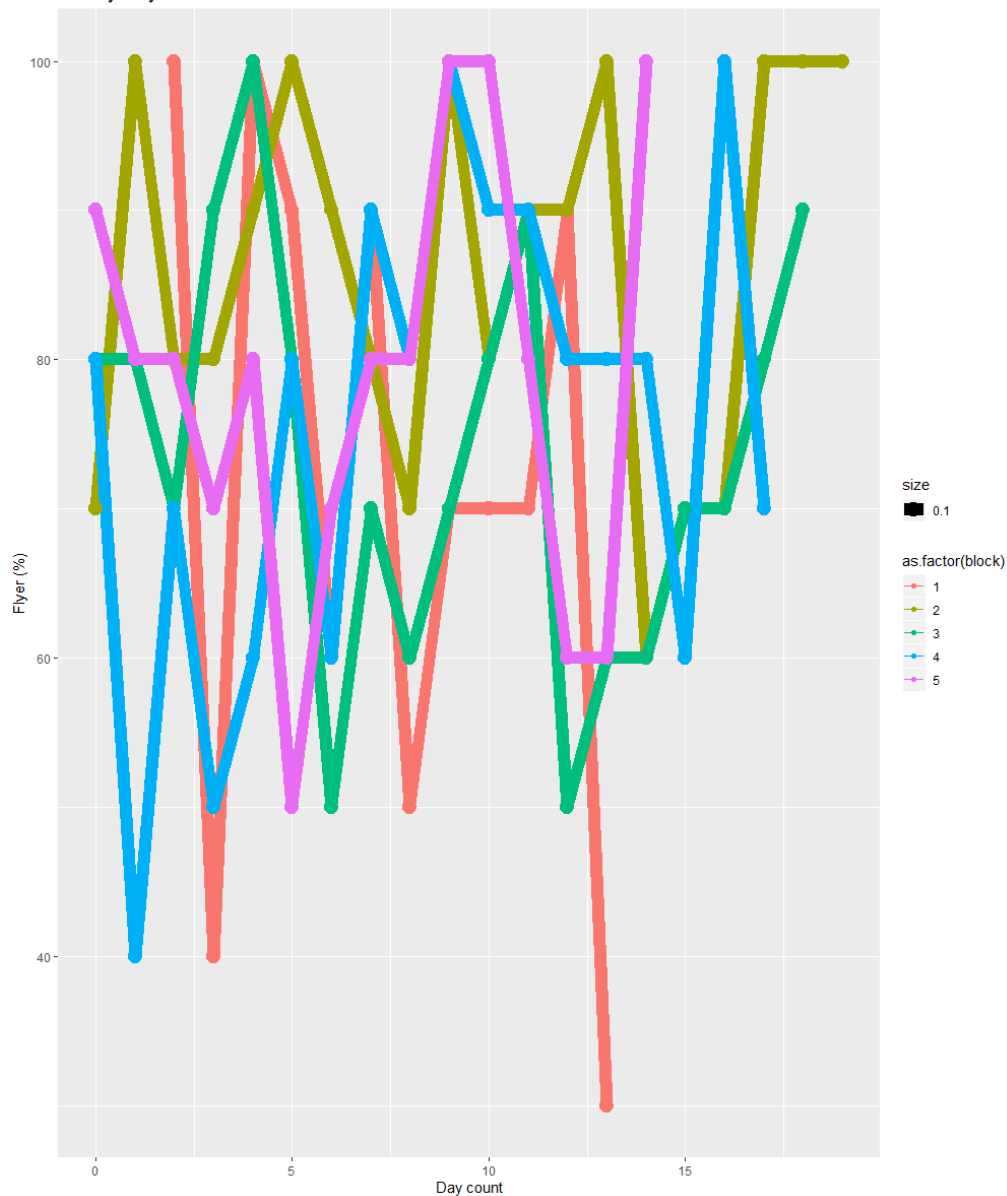

```

NET
> mas2_join_net = mas2[mas2$tec == "net",]
> ggplot(data = mas2_join_net,
+       aes(x = daycount, y = fly2, color = as.factor(block), size =0.1))
+
+ ggtitle("Net flyer by blocks and date") +
+ geom_line()+
+ geom_point()+ xlab("Day count") +
+ ylab("Flyer (%)")

```

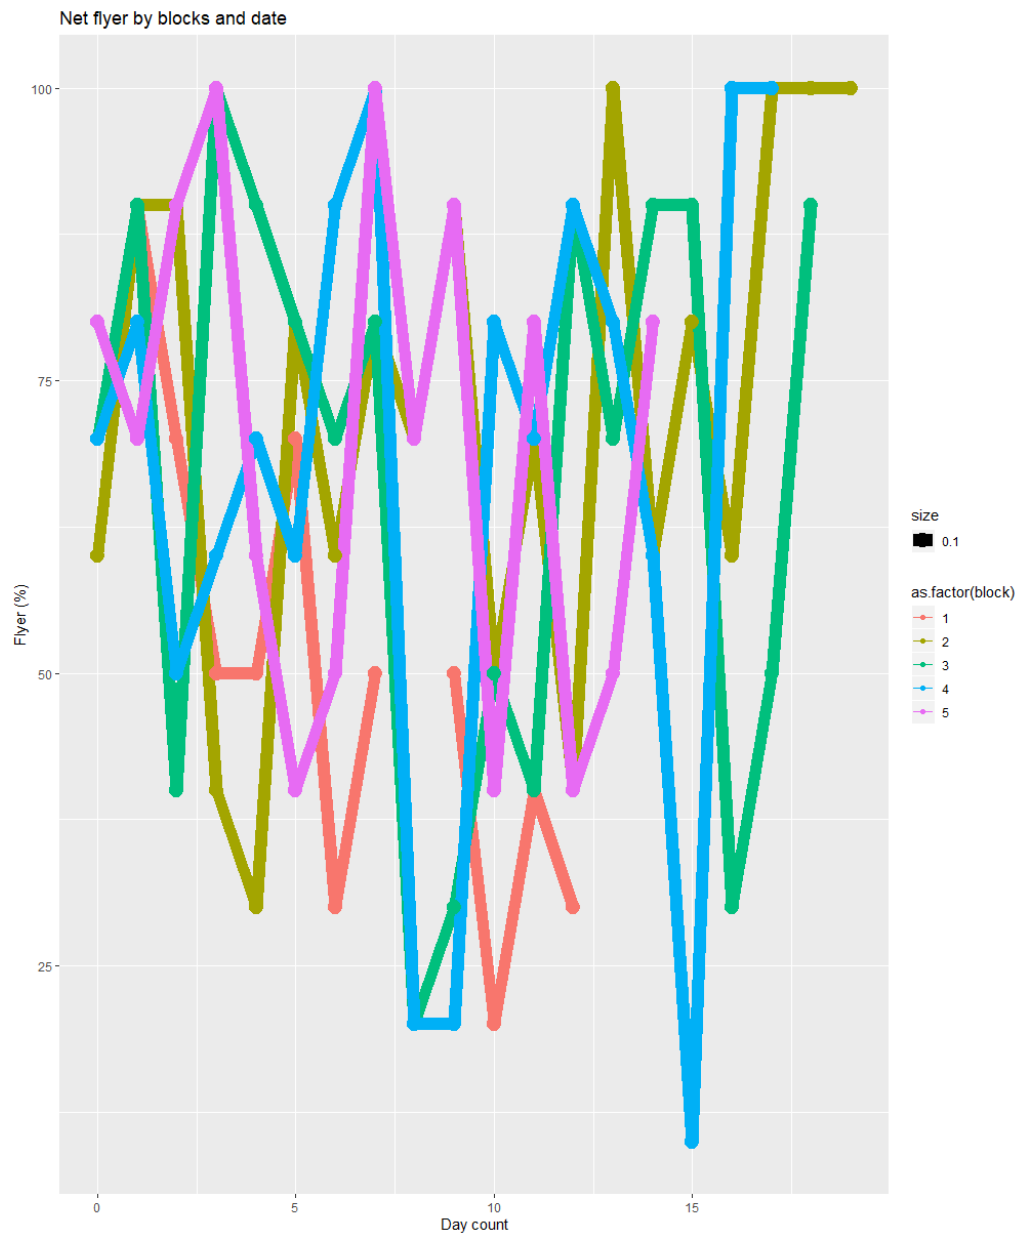

```
> boxplot(mas2$fly2~mas2$tec, data= mas2, col=c("darkcyan", "chocolate1"),
xlab="Cage type",
+       ylab="flyer (%)")
```

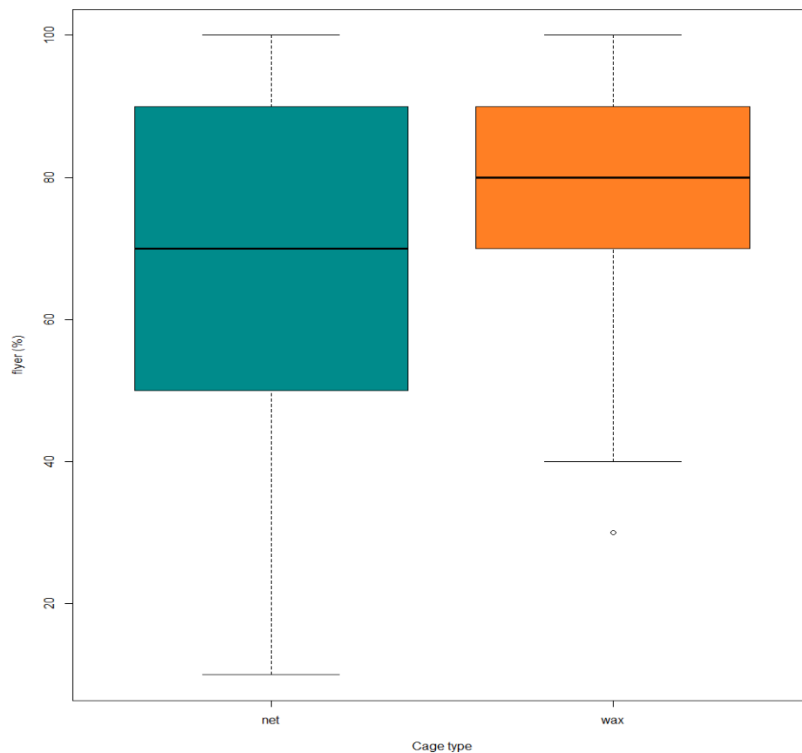

Fit model

```
> model_0 = lme(fly2~ daycount * tec, random = ~1|block,
+               data = mas2_join, method = "ML")
> summary(model_0)
```

Linear mixed-effects model fit by maximum likelihood

Data: mas2\_join

|  | AIC      | BIC      | logLik    |
|--|----------|----------|-----------|
|  | 1518.702 | 1537.481 | -753.3509 |

Random effects:

Formula: ~1 | block

(Intercept) Residual

StdDev: 5.084994 20.53746

Fixed effects: fly2 ~ daycount \* tec

|                 | Value    | Std.Error | DF  | t-value   | p-value |
|-----------------|----------|-----------|-----|-----------|---------|
| (Intercept)     | 65.52082 | 4.797516  | 161 | 13.657240 | 0.0000  |
| daycount        | -0.02835 | 0.436315  | 161 | -0.064972 | 0.9483  |
| tecwax          | 10.33028 | 6.062201  | 161 | 1.704047  | 0.0903  |
| daycount:tecwax | 0.17071  | 0.618580  | 161 | 0.275976  | 0.7829  |

Correlation:

|                 | (Intr) | daycnt | tecwax |
|-----------------|--------|--------|--------|
| daycount        | -0.740 |        |        |
| tecwax          | -0.608 | 0.583  |        |
| daycount:tecwax | 0.518  | -0.696 | -0.849 |

Standardized within-Group Residuals:

|  | Min        | Q1         | Med       | Q3        | Max       |
|--|------------|------------|-----------|-----------|-----------|
|  | -2.8344174 | -0.6732817 | 0.1045841 | 0.7465583 | 1.7148673 |

Number of Observations: 169  
Number of Groups: 5

Best fitted model

```
> model_3 = lme(fly2 ~ tec, random = ~1|block, data = mas2_join, method = "ML")
```

```
> summary(model_3)
```

Linear mixed-effects model fit by maximum likelihood

Data: mas2\_join

|  | AIC      | BIC      | logLik    |
|--|----------|----------|-----------|
|  | 1514.812 | 1527.331 | -753.4059 |

Random effects:

Formula: ~1 | block

(Intercept) Residual

StdDev: 5.108367 20.54237

Fixed effects: fly2 ~ tec

|             | Value    | Std.Error | DF  | t-value   | p-value |
|-------------|----------|-----------|-----|-----------|---------|
| (Intercept) | 65.28273 | 3.216979  | 163 | 20.293179 | 0e+00   |
| tecwax      | 11.76381 | 3.179488  | 163 | 3.699909  | 3e-04   |

Correlation:

(Intr)

tecwax -0.491

Standardized within-Group Residuals:

|  | Min        | Q1         | Med       | Q3        | Max       |
|--|------------|------------|-----------|-----------|-----------|
|  | -2.8312404 | -0.6233080 | 0.1362410 | 0.7472186 | 1.7208162 |

Number of Observations: 169

Number of Groups: 5

```
> lsmeans(model_3, pairwise ~ tec) # comparisons of groups
```

```
$lsmeans
```

| tec | lsmean | SE   | df | lower.CL | upper.CL |
|-----|--------|------|----|----------|----------|
| net | 65.3   | 3.22 | 4  | 56.4     | 74.2     |
| wax | 77.0   | 3.23 | 4  | 68.1     | 86.0     |

d.f. method: containment

Confidence level used: 0.95

```
$contrasts
```

| contrast  | estimate | SE   | df  | t.ratio | p.value |
|-----------|----------|------|-----|---------|---------|
| net - wax | -11.8    | 3.18 | 163 | -3.700  | 0.0003  |

```
> comp_m1 <- emmeans(model_3, ~tec)
```

```
> CLD(comp_m1)
```

| tec | emmean | SE   | df | lower.CL | upper.CL | .group |
|-----|--------|------|----|----------|----------|--------|
| net | 65.3   | 3.22 | 4  | 56.4     | 74.2     | 1      |
| wax | 77.0   | 3.23 | 4  | 68.1     | 86.0     | 2      |

d.f. method: containment

Confidence level used: 0.95

significance level used: alpha = 0.05

```
> data_predicted = mas2_join
```



```

> data_predicted$predictions = predict(model_3, newdata = mas2_join)
> df_means_in_time_pred = aggregate(data_predicted$predictions, by = list(d
ata_predicted$daycount,data_predicted$tec ), FUN = mean)
> names(df_means_in_time_pred) <- c("day_diff", "tec", "predictions")
> ggplot(data = data_predicted,
+       aes(x = daycount, y = predictions, color = as.factor(tec), size =
0.1)) +
+   ggtitle("Flyer per cage by blocks and date") +
+   geom_line() +
+   geom_line(aes(daycount, flyer, colour=tec), df_means_in_time)
Flyer per cage by blocks and date

```

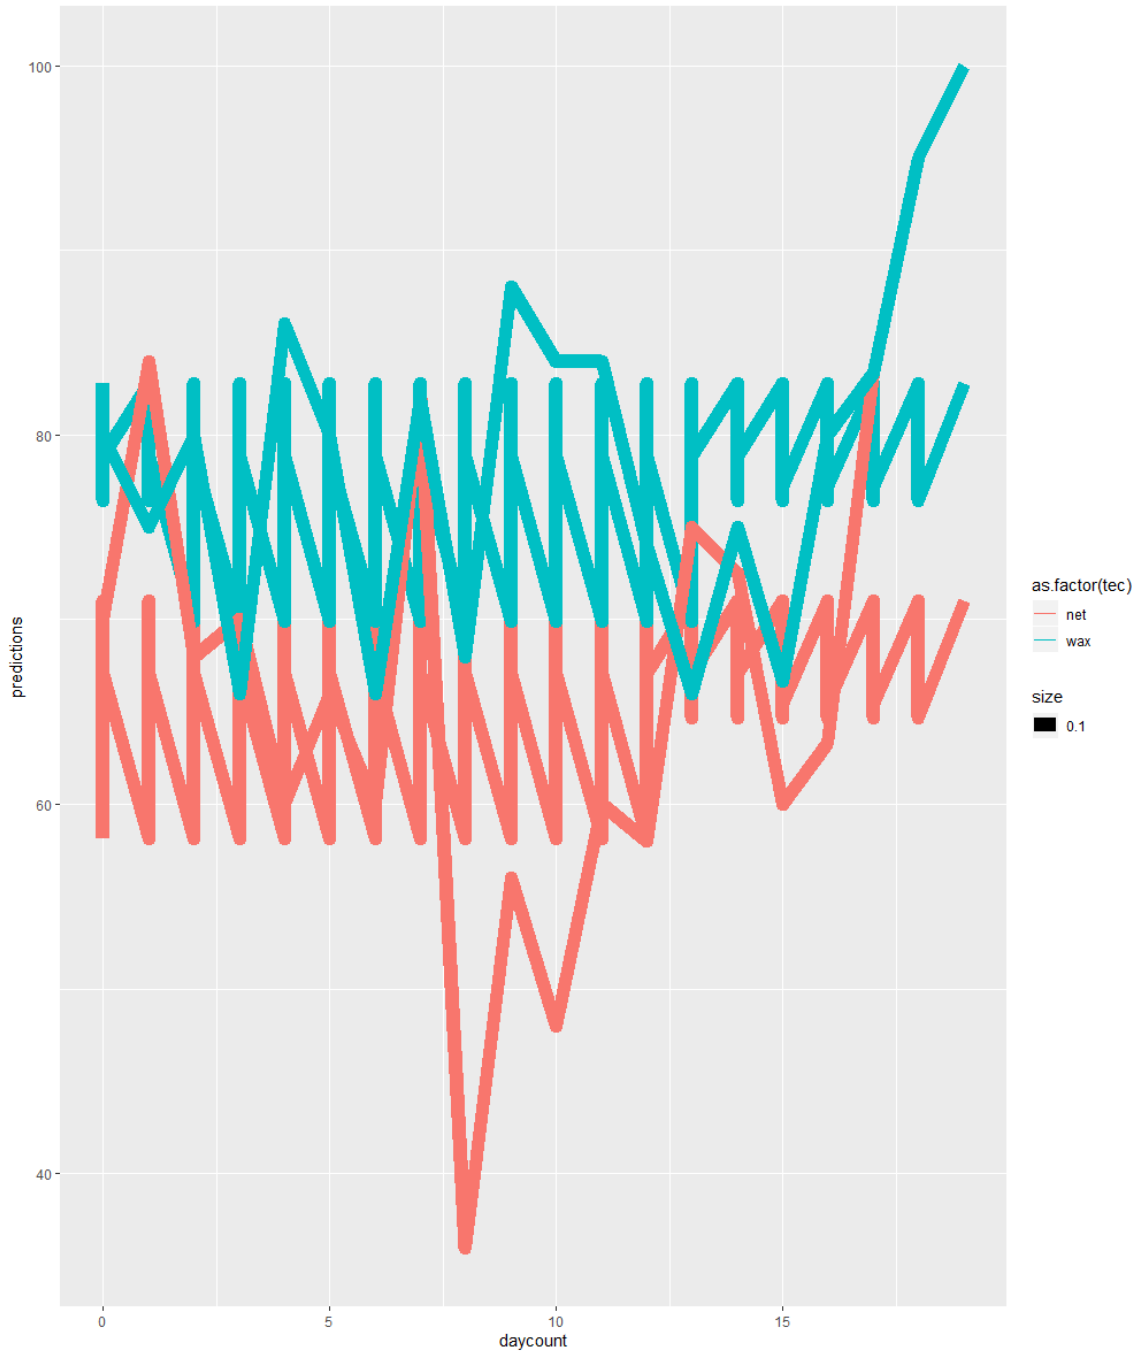

```

Homoscedasticity
> plot(model_3)

```

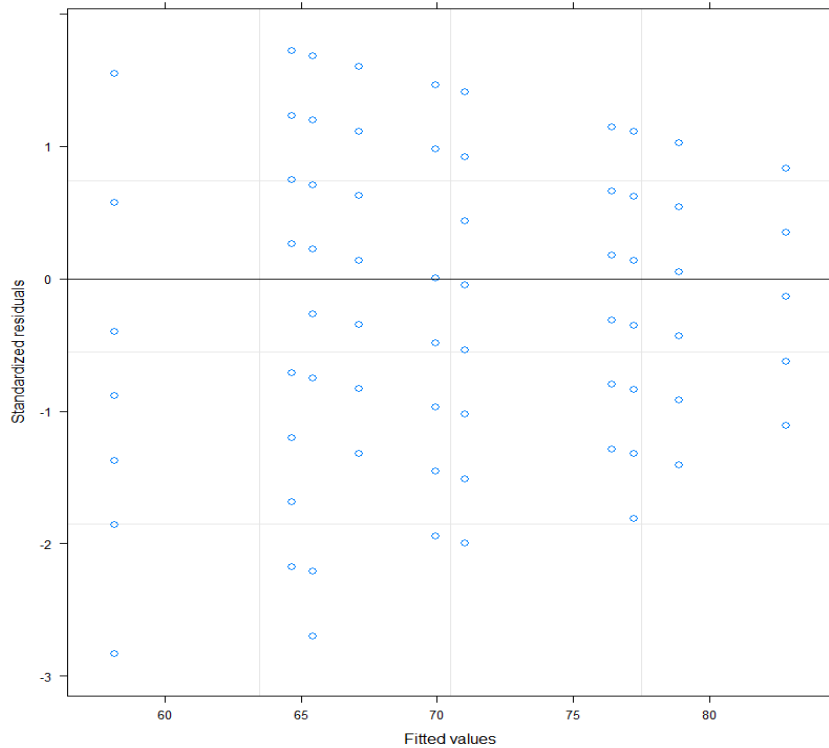

```
> intervals(model_3, which = "fixed")
Approximate 95% confidence intervals
```

Fixed effects:

|             | lower    | est.     | upper    |
|-------------|----------|----------|----------|
| (Intercept) | 58.96811 | 65.28273 | 71.59736 |
| tecwax      | 5.52278  | 11.76381 | 18.00485 |

```
attr("label")
[1] "Fixed effects:"
```

Normality

```
> res = model_3$residuals
> ggplot(data = resid(model_3))
> hist(, breaks = 20)
> qqnorm(resid(model_3))
> qqline(resid(model_3))
> qqplot(res[,1])
> qqplot(model_3$residuals)
```

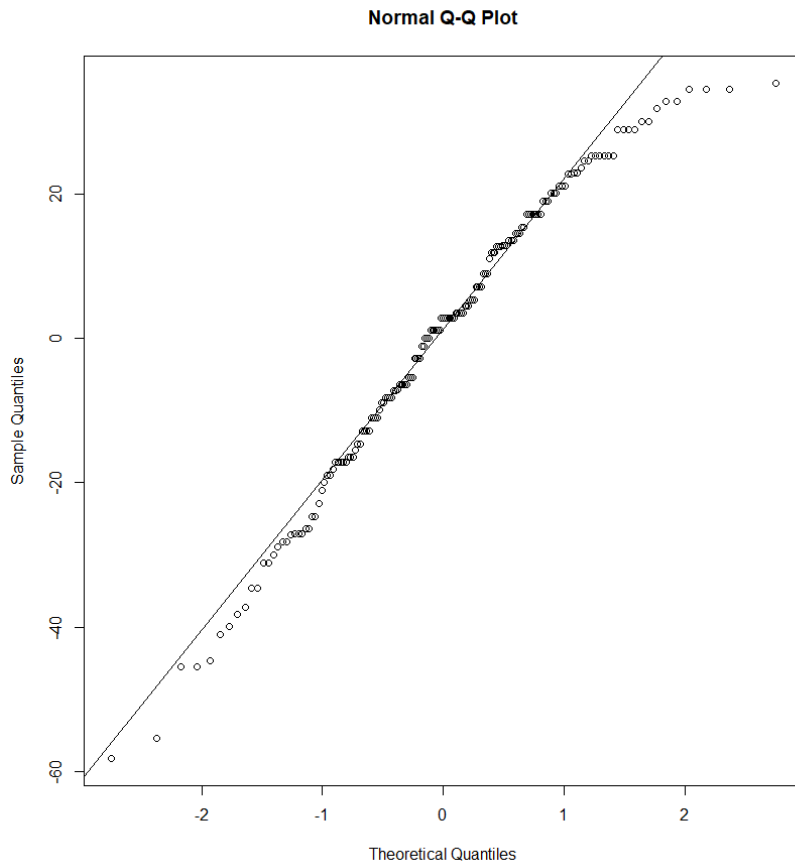

```
> shapiro.test(model_3$residuals)
Shapiro-wilk normality test
data:  model_3$residuals
w = 0.97159, p-value = 3.393e-06
> kruskal.test (fly2 ~ tec, data=mas2_join)
kruskal-wallis chi-squared = 8.7786, df = 1, p-value = 0.003048
```

S2 Dataset all parameters.

| System   | net                 | net                 | net                  | net                      | net                       | wax                 | wax                 | wax                  | wax                      | wax                       |
|----------|---------------------|---------------------|----------------------|--------------------------|---------------------------|---------------------|---------------------|----------------------|--------------------------|---------------------------|
| Replicas | Egg production [ml] | Number of egg hatch | Larva develop [days] | Number of pupae recovery | Number of adult emergence | Egg production [ml] | Number of egg hatch | Larva develop [days] | Number of pupae recovery | Number of adult emergence |
| 1        | 0.2                 | 72                  | 7                    | 66                       | 63                        | 0.05                | 16                  | 8                    | 10                       | 10                        |
| 1        | 0.2                 | 44                  | 7                    | 32                       | 31                        | 0.1                 | 84                  | 7                    | 60                       | 54                        |
| 1        | 0.4                 | 34                  | 7                    | 23                       | 21                        | 0.25                | 84                  | 7                    | 60                       | 55                        |
| 1        | 0.8                 | 30                  | 7                    | 12                       | 13                        | 0.4                 | 65                  | 7                    | 41                       | 40                        |
| 1        | 0.4                 | 21                  | 7                    | 7                        | 6                         | 0.4                 | 79                  | 7                    | 58                       | 53                        |
| 1        | 0.8                 | 31                  | 7                    | 25                       | 24                        | 0.5                 | 76                  | 7                    | 55                       | 43                        |
| 1        | 0.5                 | 56                  | 6                    | 39                       | 38                        | 0.7                 | 75                  | 7                    | 52                       | 42                        |
| 1        | 0.7                 | 14                  | 7                    | 5                        | 5                         | 0.4                 | 77                  | 7                    | 64                       | 50                        |
| 1        | 0.7                 | 32                  | 7                    | 23                       | 21                        | 0.9                 | 82                  | 6                    | 63                       | 49                        |
| 1        | 0.6                 | 50                  | 7                    | 24                       | 22                        | 0.8                 | 78                  | 7                    | 56                       | 41                        |
| 1        | 0.7                 | 45                  | 9                    | 17                       | 18                        | 0.9                 | 72                  | 9                    | 52                       | 54                        |
| 1        | 0.3                 | 37                  | 8                    | 13                       | 12                        | 0.6                 | 70                  | 8                    | 49                       | 44                        |
| 1        | 0.3                 | 26                  | 7                    | 8                        | 7                         | 0.4                 | 77                  | 7                    | 63                       | 57                        |
| 1        | 0.2                 | 31                  | 7                    | 22                       | 22                        | 0.4                 | 70                  | 7                    | 49                       | 43                        |
| 1        | 0.3                 | 10                  | NA                   | 1                        | 1                         | 0.3                 | 58                  | 8                    | 27                       | 22                        |
| 1        | 0.1                 | 17                  | NA                   | 3                        | 3                         | 0.4                 | 68                  | NA                   | 36                       | 33                        |
| 1        | 0.1                 | 32                  | NA                   | 10                       | 8                         | 0.3                 | 50                  | NA                   | 25                       | 32                        |
| 2        | 0.2                 | 86                  | NA                   | 64                       | 59                        | 0.09                | 66                  | NA                   | 46                       | 39                        |
| 2        | 0.5                 | 4                   | NA                   | 4                        | 4                         | 0.2                 | 53                  | NA                   | 41                       | 41                        |
| 2        | 0.5                 | 12                  | 6                    | 5                        | 4                         | 0.2                 | 60                  | 6                    | 41                       | 35                        |
| 2        | 0.6                 | 21                  | 6                    | 7                        | 2                         | 0.3                 | 57                  | 6                    | 31                       | 25                        |
| 2        | 0.6                 | 10                  | 8                    | 3                        | 3                         | 0.4                 | 52                  | 7                    | 40                       | 36                        |
| 2        | 0.9                 | 17                  | 8                    | 13                       | 12                        | 0.6                 | 64                  | 7                    | 48                       | 47                        |
| 2        | 0.7                 | 10                  | NA                   | 6                        | 5                         | 1                   | 78                  | 8                    | 66                       | 66                        |
| 2        | 0.6                 | 12                  | 7                    | 7                        | 7                         | 0.9                 | 63                  | 7                    | 41                       | 38                        |
| 2        | 0.6                 | 38                  | 7                    | 34                       | 31                        | 1                   | 56                  | 7                    | 27                       | 26                        |
| 2        | 0.4                 | 94                  | 7                    | 61                       | 59                        | 1                   | 31                  | 7                    | 18                       | 16                        |
| 2        | 0.6                 | 12                  | 7                    | 1                        | 1                         | 0.5                 | 44                  | 7                    | 39                       | 32                        |
| 2        | 0.4                 | 20                  | 8                    | 9                        | 8                         | 0.75                | 41                  | 8                    | 15                       | 15                        |
| 2        | 0.4                 | 25                  | 8                    | 13                       | 13                        | 0.9                 | 25                  | 8                    | 19                       | 19                        |
| 2        | 0.3                 | 67                  | 7                    | 46                       | 37                        | 0.5                 | 46                  | 7                    | 31                       | 23                        |
| 2        | 0.5                 | 52                  | 8                    | 18                       | 13                        | 0.5                 | 33                  | 8                    | 11                       | 11                        |
| 2        | 0.25                | 62                  | 7                    | 42                       | 39                        | 0.55                | 30                  | 7                    | 19                       | 19                        |
| 2        | 0.2                 | 65                  | 7                    | 43                       | 41                        | 0.6                 | 52                  | 7                    | 33                       | 15                        |
| 2        | 0.35                | 16                  | NA                   | 1                        | 1                         | 0.55                | 43                  | 8                    | 22                       | 22                        |
| 2        | 0.2                 | 20                  | 8                    | 8                        | 9                         | 0.5                 | 29                  | 8                    | 8                        | 7                         |
| 2        | 0.1                 | 50                  | 8                    | 21                       | 20                        | 0.2                 | 45                  | 8                    | 30                       | 19                        |
| 3        | 0.1                 | 64                  | 8                    | 41                       | 39                        | 0.05                | 66                  | 8                    | 49                       | 46                        |
| 3        | 0.3                 | 62                  | 8                    | 49                       | 48                        | 0.1                 | 48                  | 8                    | 19                       | 18                        |
| 3        | 0.6                 | 22                  | 7                    | 14                       | 11                        | 0.35                | 28                  | 7                    | 13                       | 11                        |

|   |      |    |    |    |    |      |    |    |    |    |
|---|------|----|----|----|----|------|----|----|----|----|
| 3 | 0.4  | 52 | 7  | 29 | 23 | 0.6  | 36 | 7  | 19 | 17 |
| 3 | 0.6  | 24 | 7  | 5  | 4  | 0.7  | 45 | 7  | 3  | 3  |
| 3 | 0.6  | 26 | 7  | 12 | 12 | 0.7  | 75 | 8  | 43 | 39 |
| 3 | 0.4  | 80 | 7  | 68 | 63 | 0.6  | 39 | 9  | 21 | 19 |
| 3 | 0.7  | 30 | 8  | 9  | 7  | 0.6  | 18 | 8  | 14 | 14 |
| 3 | 0.2  | 55 | 7  | 39 | 33 | 0.4  | 70 | 8  | 56 | 53 |
| 3 | 0.5  | 35 | 7  | 26 | 24 | 0.8  | 49 | 8  | 30 | 29 |
| 3 | 0.7  | 14 | 7  | 3  | 3  | 0.75 | 75 | 8  | 57 | 51 |
| 3 | 0.5  | 29 | 7  | 17 | 13 | 0.8  | 67 | 8  | 52 | 44 |
| 3 | 0.5  | 70 | 7  | 51 | 46 | 0.5  | 74 | 8  | 63 | 60 |
| 3 | 1.2  | 29 | 7  | 5  | 5  | 0.6  | 49 | 7  | 39 | 37 |
| 3 | 0.4  | 43 | 7  | 27 | 26 | 0.4  | 37 | 7  | 30 | 28 |
| 3 | 0.4  | 69 | 6  | 56 | 37 | 0.3  | 58 | 6  | 37 | 33 |
| 3 | 0.3  | 79 | 6  | 58 | 56 | 0.4  | 45 | 8  | 33 | 31 |
| 3 | 0.3  | 30 | 6  | 5  | 3  | 0.1  | 57 | 6  | 38 | 30 |
| 3 | 0.2  | 42 | 8  | 22 | 22 | 0.2  | 38 | 8  | 24 | 21 |
| 4 | 0.01 | 47 | 8  | 28 | 26 | 0.01 | 66 | 8  | 35 | 41 |
| 4 | 0.15 | 25 | 8  | 20 | 18 | 0.15 | 94 | 8  | 91 | 57 |
| 4 | 0.2  | 28 | 9  | 14 | 13 | 0.2  | 81 | 7  | 68 | 62 |
| 4 | 0.2  | 52 | 8  | 36 | 31 | 0.3  | 74 | 7  | 61 | 55 |
| 4 | 0.4  | 14 | 10 | 5  | 5  | 0.4  | 51 | 9  | 28 | 30 |
| 4 | 0.6  | 24 | 9  | 14 | 12 | 0.6  | 52 | 8  | 25 | 31 |
| 4 | 0.5  | 34 | 7  | 24 | 20 | 0.65 | 67 | 9  | 39 | 42 |
| 4 | 0.3  | 70 | 7  | 44 | 36 | 0.6  | 32 | 10 | 9  | 8  |
| 4 | 0.4  | 50 | 7  | 28 | 24 | 0.7  | 59 | 8  | 23 | 22 |
| 4 | 0.6  | 50 | 7  | 33 | NA | 0.7  | 23 | NA | 12 | 12 |
| 4 | 0.3  | 82 | 6  | 68 | 63 | 0.6  | 58 | 6  | 30 | 26 |
| 4 | 0.7  | 37 | 8  | 20 | 18 | 0.7  | 46 | 8  | 16 | 17 |
| 4 | 0.5  | 80 | 7  | 74 | 68 | 0.7  | 43 | 9  | 17 | 10 |
| 4 | 0.5  | 82 | 7  | 64 | 54 | 0.7  | 56 | 7  | 42 | 30 |
| 4 | 0.5  | 90 | 7  | 71 | 67 | 0.6  | 73 | NA | 37 | 40 |
| 4 | 0.6  | 51 | 9  | 28 | 25 | 0.5  | 57 | 8  | 34 | 32 |
| 4 | 0.55 | 52 | 8  | 30 | 31 | 0.6  | 51 | 8  | 34 | 31 |
| 4 | 0.6  | 66 | 10 | 12 | 9  | 0.5  | 67 | 10 | 45 | 36 |
| 4 | 0.6  | 54 | 9  | 18 | 9  | 0.6  | 46 | 9  | 21 | 18 |
| 4 | 0.3  | 45 | 8  | 33 | 30 | 0.4  | 46 | 8  | 18 | 14 |
| 4 | 0.2  | 79 | 7  | 51 | 42 | 0.3  | 52 | 8  | 16 | 15 |
| 4 | 0.2  | 67 | 7  | 33 | 30 | 0.3  | 48 | 7  | 21 | 15 |
| 5 | 0.05 | 69 | 9  | 49 | 43 | 0.05 | 78 | 9  | 66 | 75 |
| 5 | 0.25 | 35 | 9  | 28 | 26 | 0.2  | 25 | 9  | 25 | 22 |
| 5 | 0.4  | 40 | 8  | 16 | 16 | 0.4  | 59 | 8  | 35 | 24 |
| 5 | 0.5  | 55 | 8  | 47 | 55 | 0.6  | 62 | 7  | 48 | 47 |
| 5 | 0.5  | 36 | 8  | 18 | 16 | 0.5  | 73 | 8  | 40 | 38 |
| 5 | 0.4  | 31 | 8  | 13 | 9  | 0.6  | 61 | 8  | 39 | 36 |
| 5 | 0.3  | 34 | 8  | 25 | 20 | 0.6  | 62 | 8  | 47 | 24 |
| 5 | 0.5  | 39 | 8  | 27 | 22 | 0.6  | 70 | 7  | 50 | 46 |

|             |       |      |     |      |      |      |      |     |      |      |
|-------------|-------|------|-----|------|------|------|------|-----|------|------|
| 5           | 0.6   | 45   | 8   | 25   | 24   | 0.8  | 75   | 8   | 52   | 48   |
| 5           | 0.6   | 23   | NA  | 9    | 9    | 0.8  | 71   | NA  | 44   | 41   |
| 5           | 0.7   | 16   | NA  | 5    | 5    | 0.6  | 56   | NA  | 32   | 30   |
| 5           | 0.7   | 17   | NA  | 9    | 8    | 0.4  | 53   | NA  | 43   | 40   |
| 5           | 0.5   | 21   | NA  | 16   | 15   | 0.5  | 64   | NA  | 50   | 42   |
| 5           | 0.3   | 63   | NA  | 48   | 42   | 0.4  | 67   | NA  | 59   | 57   |
| 5           | 0.3   | 70   | NA  | 38   | 38   | 0.3  | 65   | NA  | 21   | 26   |
| 5           | 0.2   | 80   | NA  | 75   | 61   | 0.2  | 80   | NA  | 70   | 48   |
| Grand Total | 40.86 | 4058 | 605 | 2525 | 2246 | 46.4 | 5386 | 618 | 3529 | 3145 |

### S3. Dataset quality control parameters.

| System   |                 | net               | net             | wax               | wax             |
|----------|-----------------|-------------------|-----------------|-------------------|-----------------|
| Replicas | Number of pupae | Number of emerged | Number of flyer | Number of emerged | Number of flyer |
| 1        | 10              | 9                 | 7               | 10                | 10              |
| 1        | 10              | 9                 | 9               | 5                 | 4               |
| 1        | 10              | 8                 | 7               | 10                | 10              |
| 1        | 10              | 5                 | 5               | 9                 | 9               |
| 1        | 10              | 6                 | 5               | NA                | NA              |
| 1        | 10              | 9                 | 7               | 8                 | 6               |
| 1        | 10              | 5                 | 3               | 9                 | 9               |
| 1        | 10              | 7                 | 5               | 6                 | 5               |
| 1        | 10              | 1                 | 0               | 7                 | 7               |
| 1        | 10              | 8                 | 5               | 7                 | 7               |
| 1        | 10              | 4                 | 2               | 8                 | 7               |
| 1        | 10              | 6                 | 4               | 9                 | 9               |
| 1        | 10              | 4                 | 3               | 7                 | 3               |
| 2        | 10              | 8                 | 6               | 8                 | 7               |
| 2        | 10              | 10                | 9               | 10                | 10              |
| 2        | 10              | 9                 | 9               | 10                | 8               |
| 2        | 10              | 5                 | 4               | 8                 | 8               |
| 2        | 10              | 6                 | 3               | 9                 | 9               |
| 2        | 10              | 8                 | 8               | 10                | 10              |
| 2        | 10              | 7                 | 6               | 9                 | 9               |
| 2        | 10              | 9                 | 8               | 9                 | 8               |
| 2        | 10              | 9                 | 7               | 10                | 7               |
| 2        | 10              | 10                | 9               | 10                | 10              |
| 2        | 10              | 7                 | 5               | 8                 | 8               |
| 2        | 10              | 8                 | 7               | 10                | 9               |
| 2        | 10              | 6                 | 4               | 10                | 9               |
| 2        | 10              | 10                | 10              | 10                | 10              |
| 2        | 10              | 7                 | 6               | 8                 | 6               |
| 2        | 10              | 8                 | 8               | 7                 | 7               |
| 2        | 10              | 6                 | 6               | 8                 | 7               |
| 2        | 10              | 10                | 10              | 10                | 10              |
| 2        | 10              | 10                | 10              | 10                | 10              |

|   |    |    |    |    |    |
|---|----|----|----|----|----|
| 2 | 10 | 10 | 10 | 10 | 10 |
| 3 | 10 | 8  | 7  | 9  | 8  |
| 3 | 10 | 9  | 9  | 9  | 8  |
| 3 | 10 | 6  | 4  | 7  | 7  |
| 3 | 10 | 10 | 10 | 9  | 9  |
| 3 | 10 | 10 | 9  | 10 | 10 |
| 3 | 10 | 8  | 8  | 9  | 8  |
| 3 | 10 | 8  | 7  | 7  | 5  |
| 3 | 10 | 8  | 8  | 9  | 7  |
| 3 | 10 | 4  | 2  | 6  | 6  |
| 3 | 10 | 4  | 3  | 7  | 7  |
| 3 | 10 | 6  | 5  | 8  | 8  |
| 3 | 10 | 7  | 4  | 10 | 9  |
| 3 | 10 | 9  | 9  | 8  | 5  |
| 3 | 10 | 8  | 7  | 8  | 6  |
| 3 | 10 | 10 | 9  | 8  | 6  |
| 3 | 10 | 10 | 9  | 9  | 7  |
| 3 | 10 | 5  | 3  | 8  | 7  |
| 3 | 10 | 7  | 5  | 8  | 8  |
| 3 | 10 | 9  | 9  | 9  | 9  |
| 4 | 10 | 7  | 7  | 9  | 8  |
| 4 | 10 | 10 | 8  | 8  | 4  |
| 4 | 10 | 6  | 5  | 8  | 7  |
| 4 | 10 | 8  | 6  | 5  | 5  |
| 4 | 10 | 9  | 7  | 9  | 6  |
| 4 | 10 | 7  | 6  | 10 | 8  |
| 4 | 10 | 9  | 9  | 9  | 6  |
| 4 | 10 | 10 | 10 | 9  | 9  |
| 4 | 10 | 4  | 2  | 9  | 8  |
| 4 | 10 | 5  | 2  | 10 | 10 |
| 4 | 10 | 8  | 8  | 9  | 9  |
| 4 | 10 | 8  | 7  | 9  | 9  |
| 4 | 10 | 10 | 9  | 8  | 8  |
| 4 | 10 | 8  | 8  | 9  | 8  |
| 4 | 10 | 7  | 6  | 9  | 8  |
| 4 | 10 | 1  | 1  | 7  | 6  |
| 4 | 10 | 10 | 10 | 10 | 10 |
| 4 | 10 | 10 | 10 | 10 | 7  |
| 5 | 10 | 8  | 8  | 9  | 9  |
| 5 | 10 | 8  | 7  | 8  | 8  |
| 5 | 10 | 10 | 9  | 8  | 8  |
| 5 | 10 | 10 | 10 | 8  | 7  |
| 5 | 10 | 8  | 6  | 8  | 8  |
| 5 | 10 | 5  | 4  | 8  | 5  |
| 5 | 10 | 5  | 5  | 8  | 7  |
| 5 | 10 | 10 | 10 | 9  | 8  |

|             |     |     |     |     |     |
|-------------|-----|-----|-----|-----|-----|
| 5           | 10  | 7   | 7   | 8   | 8   |
| 5           | 10  | 9   | 9   | 10  | 10  |
| 5           | 10  | 5   | 4   | 10  | 10  |
| 5           | 10  | 8   | 8   | 8   | 8   |
| 5           | 10  | 4   | 4   | 6   | 6   |
| 5           | 10  | 5   | 5   | 6   | 6   |
| 5           | 10  | 8   | 8   | 10  | 10  |
| Grand Total | 860 | 637 | 559 | 718 | 652 |
